# Supplementary material for: A ribosomally synthesized and post-translationally modified peptide containing a β-amino acid and a macrocyclic motif
Source: Research Square preprint supplement (doi:10.21203/rs.3.rs-352308/v1), 2021-04-14
Supplement: Supplementary file 1 [file 2a6e9a8411d4a462bf0a4484.docx]

Supporting information -Figures 1-20

[**Supplementary figures** 2](#_Toc67128031)

[Figure S2. 1H NMR of kindtamdin in CD3OD at 600 MHz. 3](#_Toc67128032)

[Figure S3. 13C NMR spectrum for **1** in CD3OD at 150 MHz. 4](#_Toc67128033)

[Figure S4. COSY spectrum of **1**. 5](#_Toc67128034)

[Figure S5. HMBC spectrum of **1**. 6](#_Toc67128035)

[Figure S6. HSQC-TOCSY of **1**. 7](#_Toc67128036)

[Figure S7. HSQC spectrum of **1**. 8](#_Toc67128037)

[Figure S8. Substructure of **1** containing multiple (*Z*)-Dhb motif. 9](#_Toc67128038)

[Figure S9. Key ROESY correlations indicating *Z* configurations of Dhbs 2, 3, 4, and 6. 10](#_Toc67128039)

[Figure S10. Key correlations in the ROESY spectra in support of configuration shown in Figure S3. 11](#_Toc67128040)

[Figure S17. Expanded and annotated 1H NMR spectrum of **1**. 18](#_Toc67128041)

[Figure S18. Expanded and annotated 1H NMR spectrum of **1**. 19](#_Toc67128042)

[Figure S19. Expanded and annotated 1H NMR spectrum of **1**. 20](#_Toc67128043)

[Figure S20. Expanded and annotated 1H NMR spectrum of **1**. 21](#_Toc67128044)

**Supplementary figures**


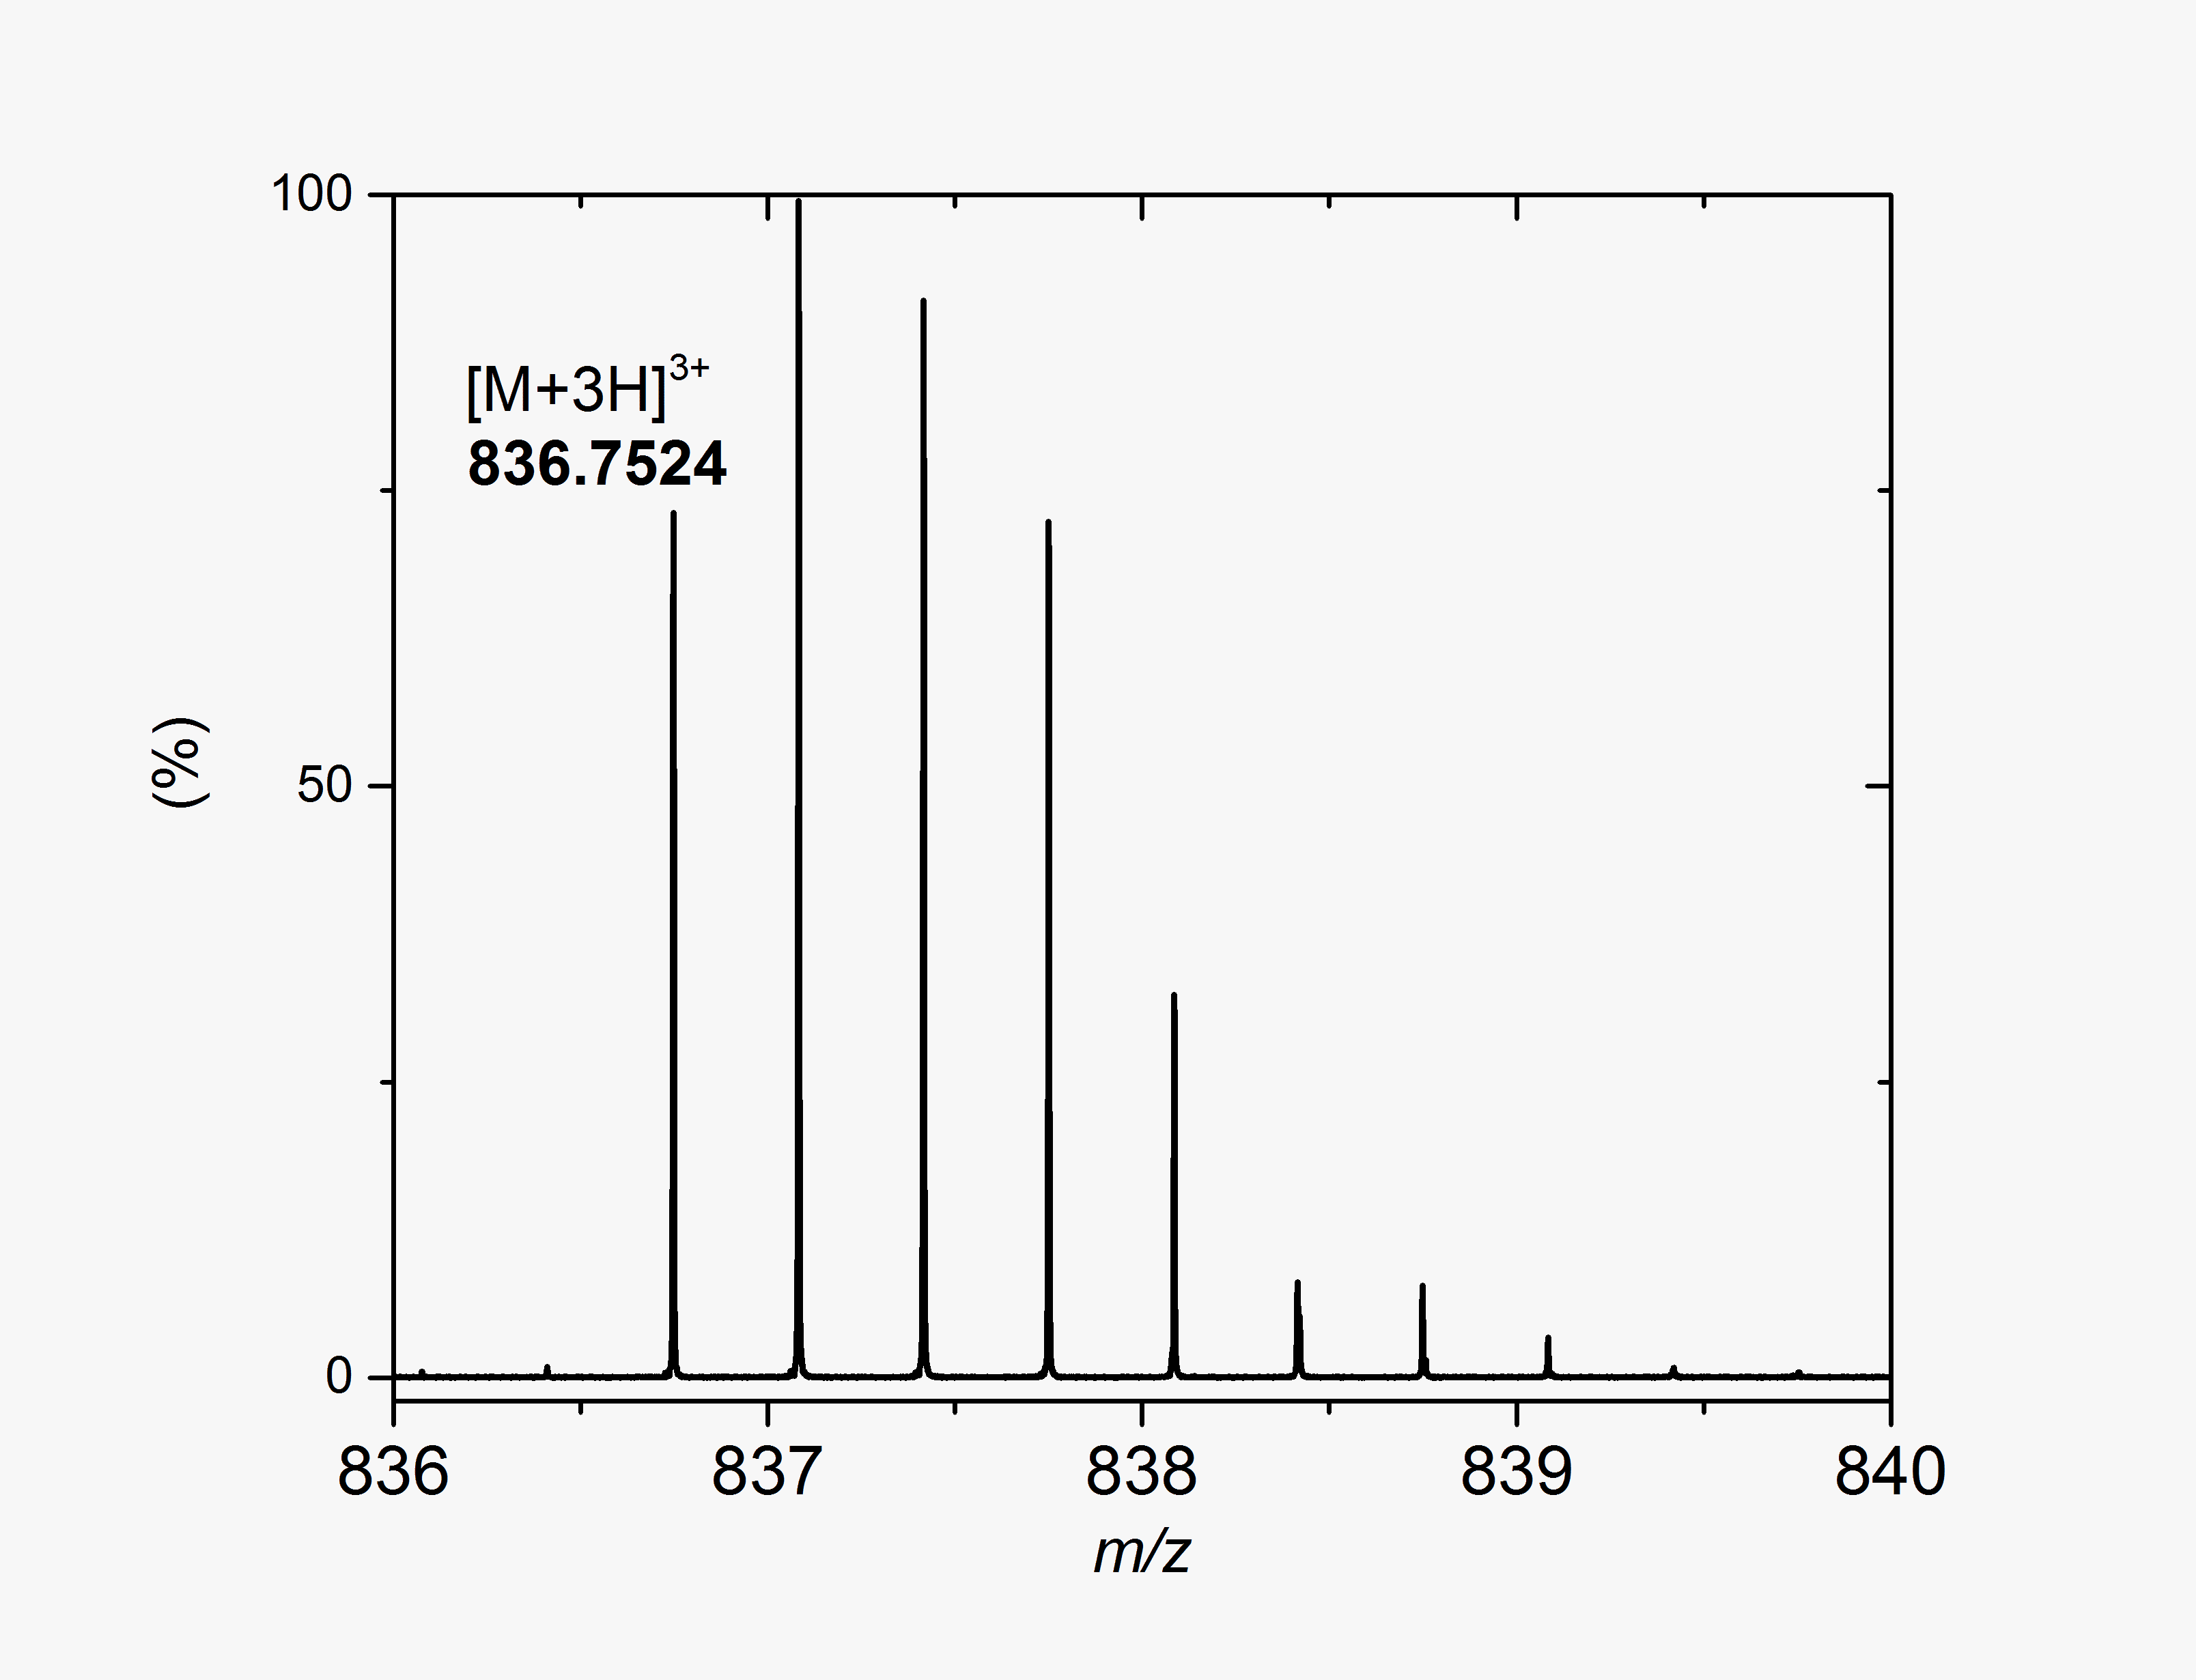


Figure S1. High Resolution ESI FT-ICR Mass Spectrometry analysis of **1.** MS analysis revealed a dominant [M+3H]3+ ion of *m/z* 836.7524, consistent with a neutral molecular mass of 2507.2349 Da.

Figure S2. 1H NMR of kindtamdin in CD3OD at 600 MHz.

Figure S3. 13C NMR spectrum for **1** in CD3OD at 150 MHz.

Figure S4. COSY spectrum of **1**.

Figure S5. HMBC spectrum of **1**.

Figure S6. HSQC-TOCSY of **1**.

Figure S7. HSQC spectrum of **1**.

Figure S8. Substructure of **1** containing multiple (*Z*)-Dhb motif.

Dha-8-NH

Val-19-3

Dha-8-4

Dha-8-NH-Dha-8-4

Dhab-20-NH-Dhb-20-4

Dhab-20-NH-Val-19-3

Dhab-6-NH-

Dhb-6-4

Dhab-4-NH-

Dhb-4-4

Dhab-4-NH-Dhb-3-3

Dhab-4-NH-

Val-5-2

Dhb-3-3

Val-5-2

Figure S9. Key ROESY correlations indicating *Z* configurations of Dhbs 2, 3, 4, and 6.

Dbh-2-3

Dbh-2-NH-Me2-Ile-1-2

DBh-2-NH-

Dbh-2-4

DBh-3-NH-

Dbh-3-4

DBh-3-NH-

Dbh-2-3

Dbh-2-4

Dbh-3-4

Figure S10. Key correlations in the ROESY spectra in support of configuration shown in Figure S3.

Figure S11. Three key substructures based on detail analysis of Hα-NH (i, i+1) ROESY correlations and NH to -CO, Hα to -CO HMBC cross peaks between adjacent amino acids allowed partial determination of peptide sequence. The fragments were unambiguously assigned by NMR and these were: (NMe2Ile-Dhb-Dhb-Dhb-Val-Dhb), Dha-Glu-Ile-Ala(S1)-Val-Ala, Ala-Ala-Ala-Val-Dhb-Ala-Abu(S2)-Trp.

Figure S12. HSQC chemical shifts for Aaa-7. Inset, 1H splitting of 7.2 Hz indicating *cis*-geometry for Aaa-7. An unprecedented unsaturated β amino acid, (*cis*)-3-amino-acrylic acid (Aaa) was found to be present in **1** based on characteristic NMR 1H coupling constants and chemical shifts in the HSQC.


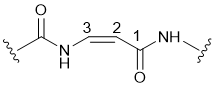


Figure S13. Key COSY correlation within Aaa-7 subunit. An unprecedented unsaturated β amino acid, (*cis*)-3-amino-acrylic acid (Aaa) was found to be present in **1** based on cross peaks in COSY.

Figure S14. Key HMBC Correlation within Aaa-7. An unprecedented unsaturated β amino acid, (*cis*)-3-amino-acrylic acid (Aaa) was found to be present in **1** based on HMBC.


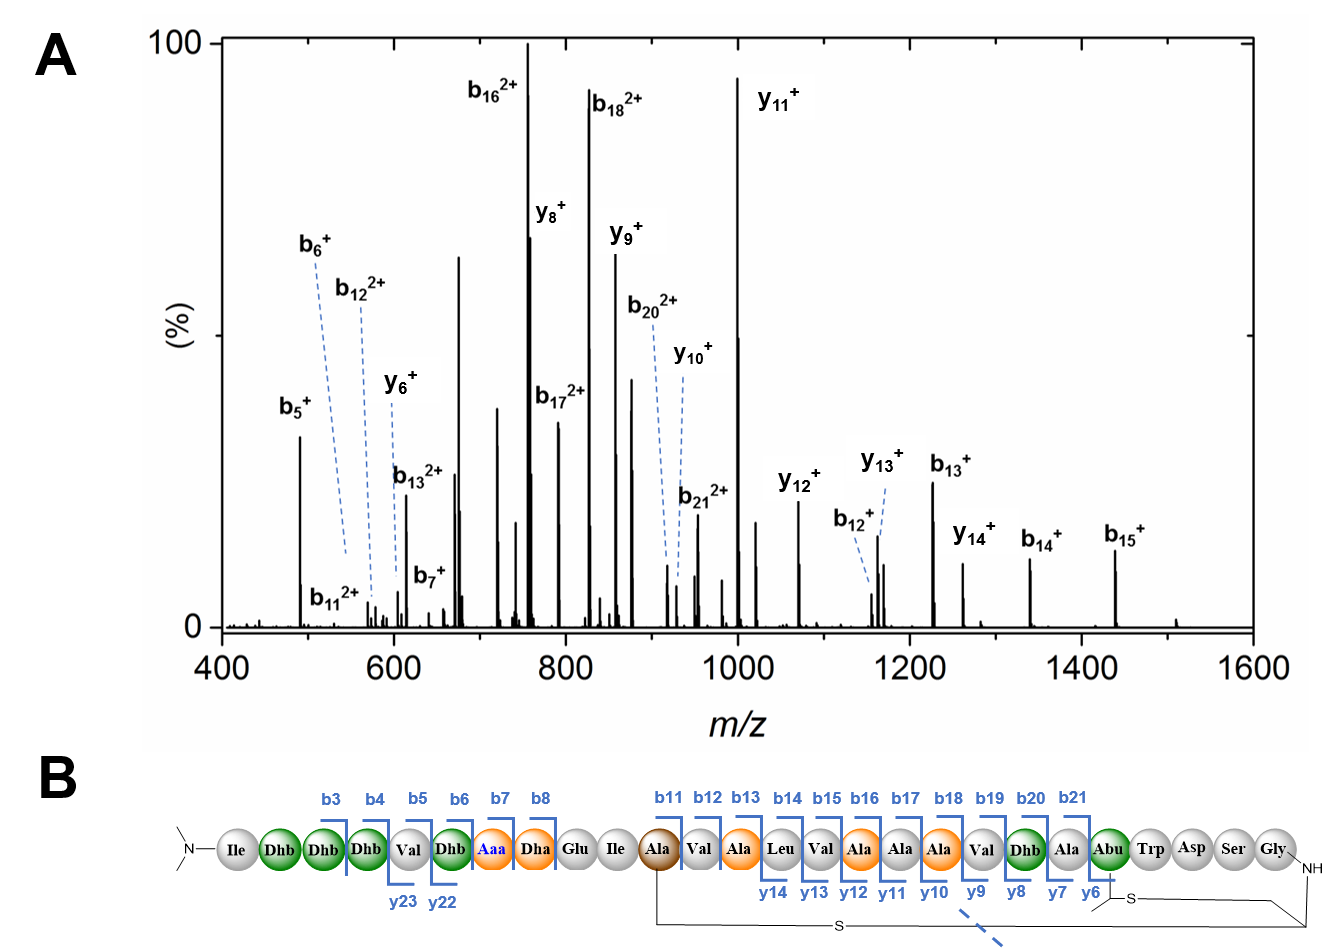


Figure S15**.** High Resolution *De Novo* Tandem MS analysis of kintamdin **1.** The [M+3H]3+ ion at *m/z* 836.7524 was analysed by MS2 and pseudo MS3 by FT-ICR MS. **A**. A typical MS2 spectrum is shown with assigned fragments annotated. **B**. The overall sequence coverage from combined fragmentation experiments is shown. Assigned fragments are also shown in Table S1.

**
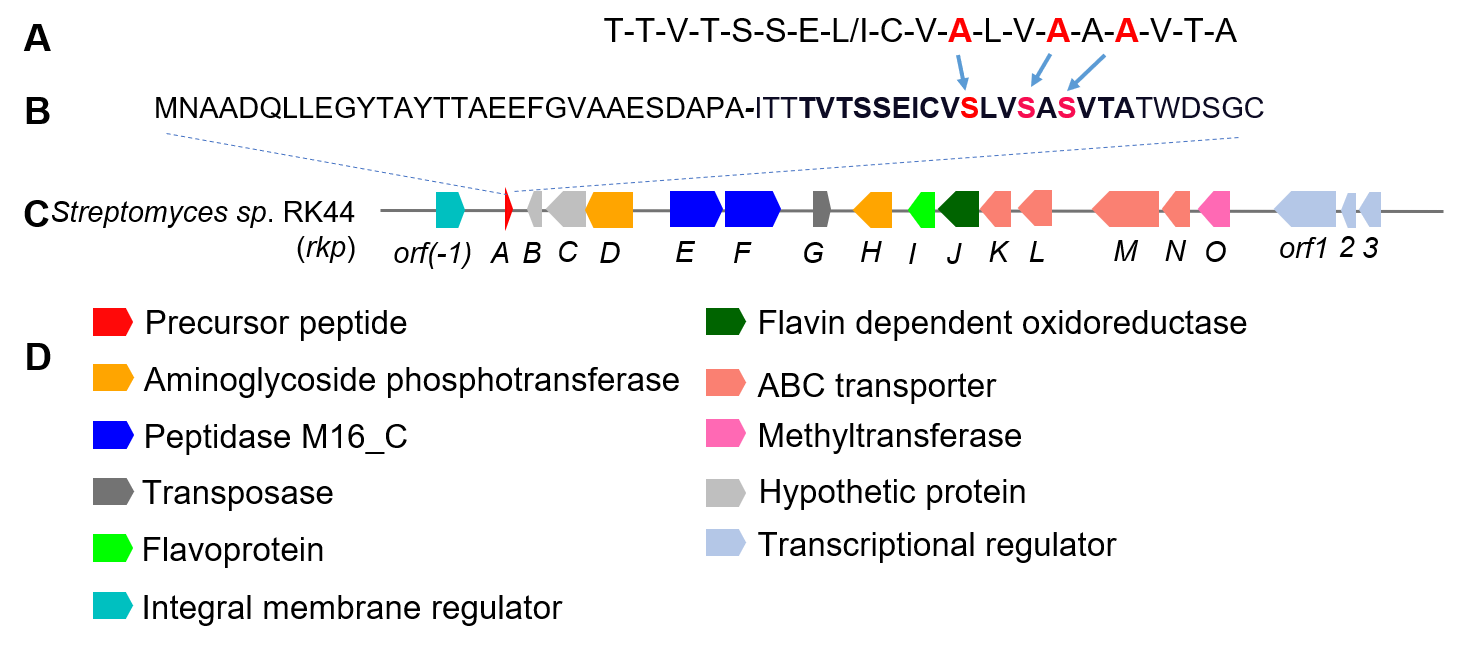
**

Figure S16. The putative BGC responsible for the kintamdin production in *Streptomyces* sp. RK44. **A**. The sequence tag generated from NMR and tandem MS analysis. **B**. the sequence of the precursor peptide (KinA). Three of Ser amino acids in the genomic sequence (Ser-13, 16 and 18, highlighted in red) was present in the final structure as Ala residues highlighted in red. **C**. the arrangement of the *kin* BGC. **D**. The biosynthetic genes in the *kin* BGC with assigned functions.


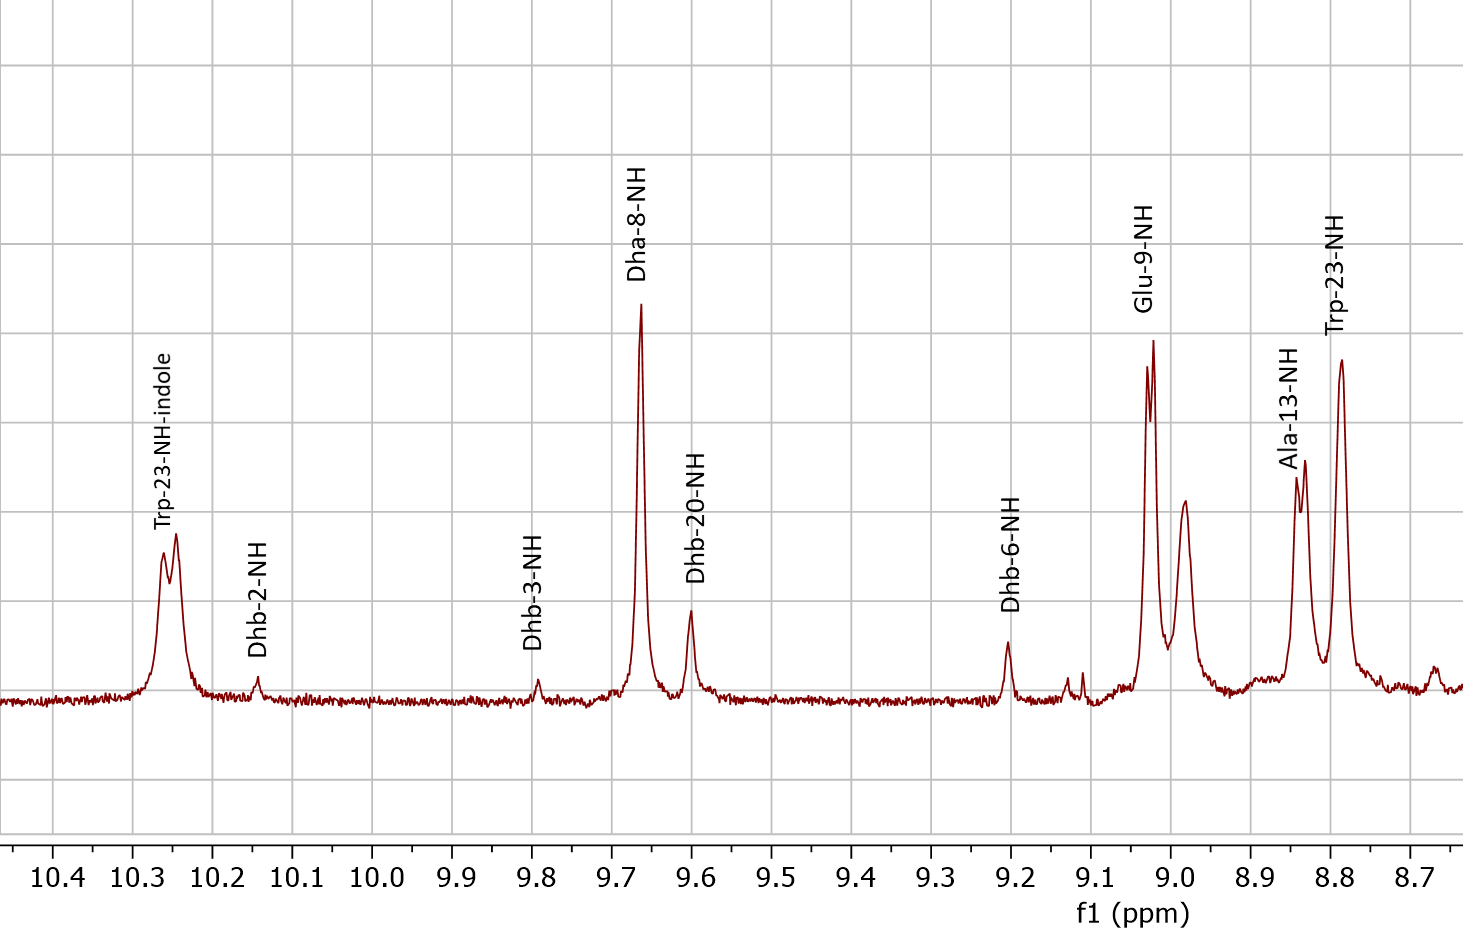


Figure S17. Expanded and annotated 1H NMR spectrum of **1**.


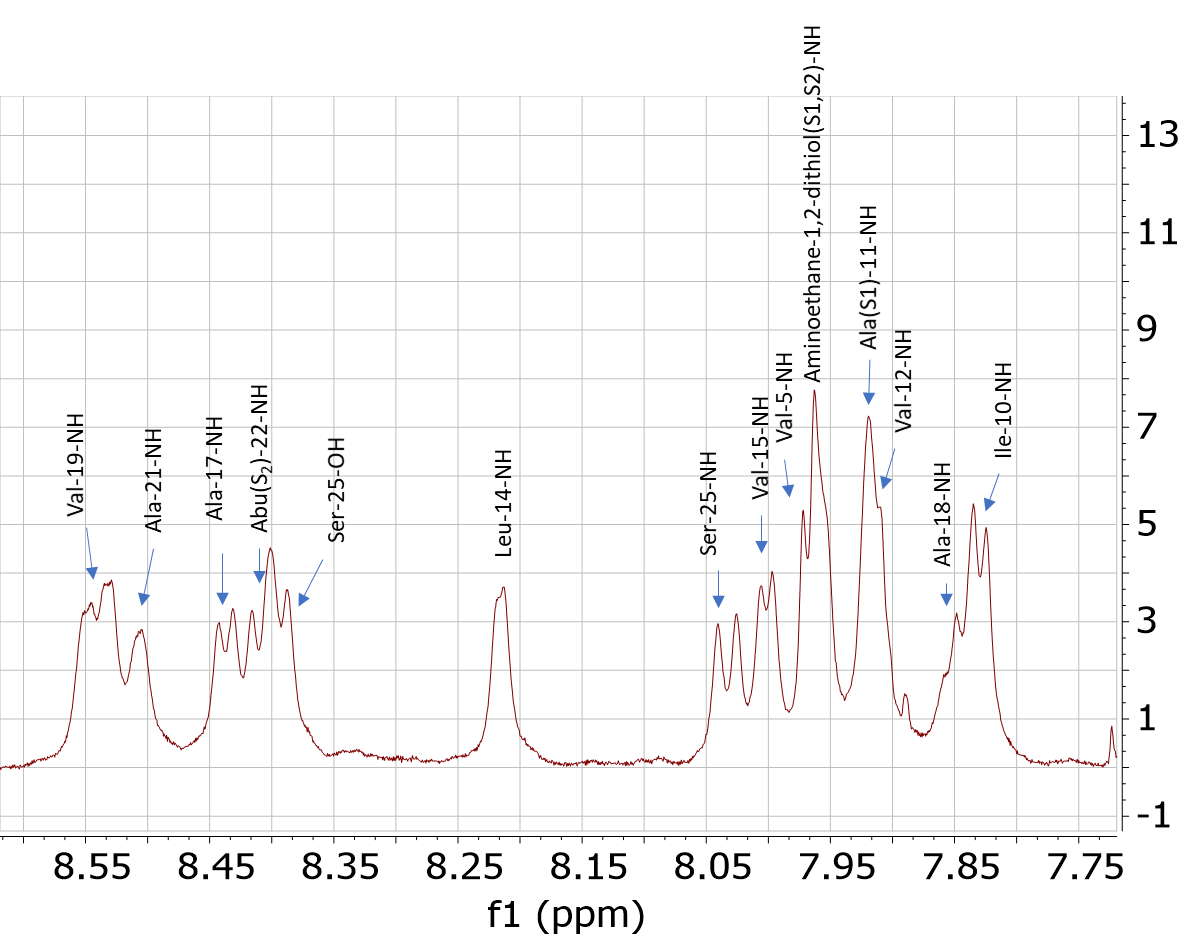


Figure S18. Expanded and annotated 1H NMR spectrum of **1**.


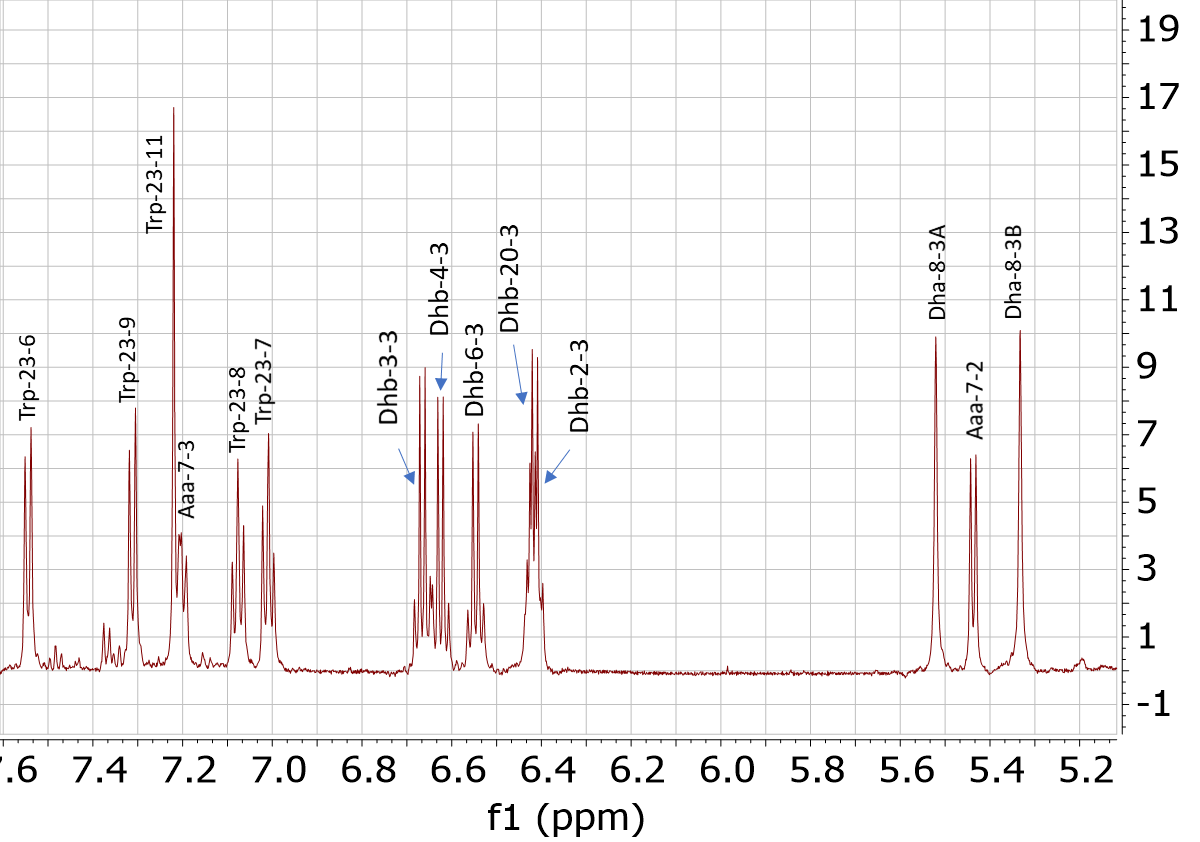


Figure S19. Expanded and annotated 1H NMR spectrum of **1**.


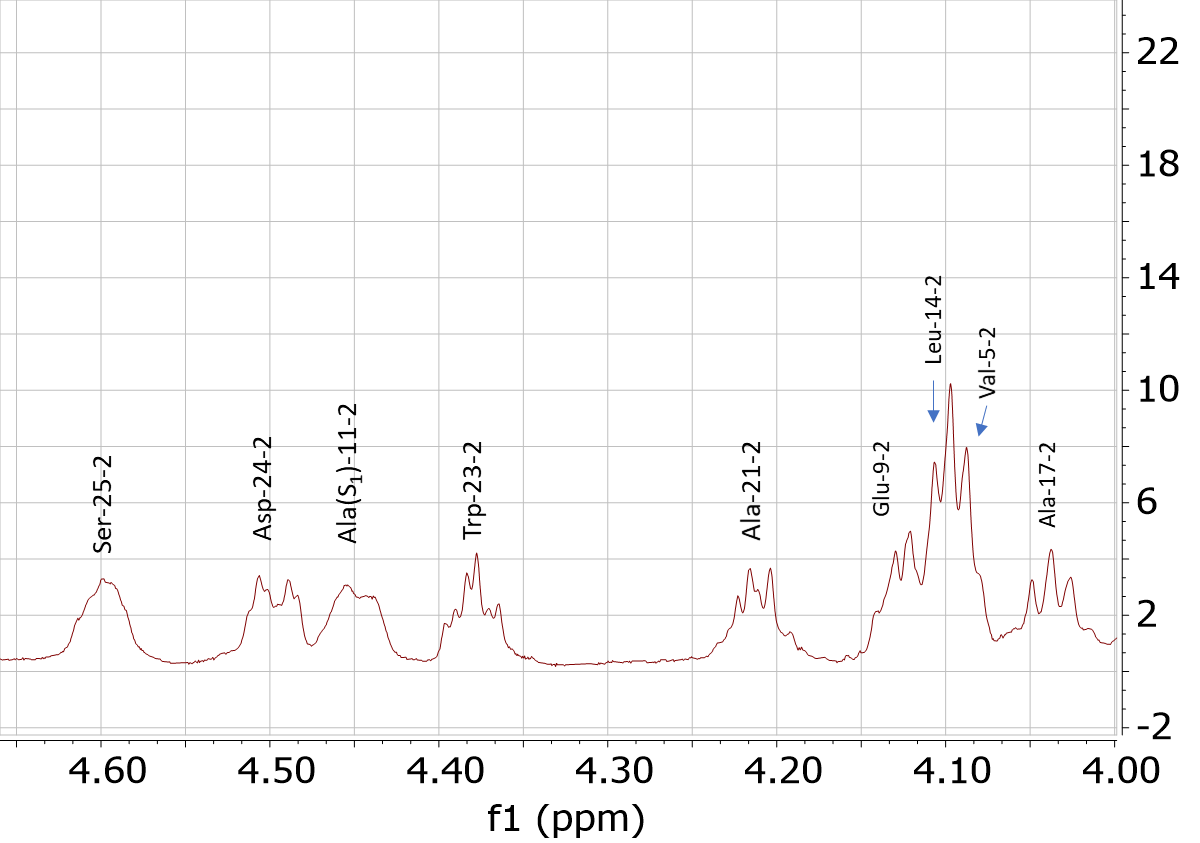


Figure S20. Expanded and annotated 1H NMR spectrum of **1**.
