# Supplementary material for: A ribosomally synthesized and post-translationally modified peptide containing a β-amino acid and a macrocyclic motif
Source: Research Square preprint supplement (doi:10.21203/rs.3.rs-352308/v1), 2021-04-14
Supplement: Supplementary file 2 [file 31716b3d76ac6ee556ade596.docx]

Supporting information -Tables

[Table S1. Fragmentation ions of **1** observed in HR-MS analysis. 2](#_Toc67124440)

[Table S2. Chemical shifts of NMR analysis of **1**. 3](#_Toc67124441)

[Table S3. The retention time comparison of derivatized standard amino acids and amino acid residues from kintamdin after acidic hydrolysis. 7](#_Toc67124442)

[Table S4. Computational calculation of distances of key correlations in NOE among eight diastereoisomers in **1**. 8](#_Toc67124443)

[Table S5. Bioassay Activity evaluation of kintamdin **1**. 25](#_Toc67124444)

[Table S6. Deduced Functions of *orfs* in the Kintaridin Biosynthetic Gene Cluster. 26](#_Toc67124445)

[Table S7. Plasmids used in this study. 28](#_Toc67124446)

[Table S8. Strains used in this study. 29](#_Toc67124447)

[Table S9. Primers used in this study. 31](#_Toc67124448)

[Table S10. KinA homologs identified by BlastP. 34](#_Toc67124449)

**Supplementary tables**

Table S1. Fragmentation ions of **1** observed in HR-MS analysis.

| **Ion** | **z** | **Observed m/z** | **Calculated m/z** | **Mass error (ppm)** |
| --- | --- | --- | --- | --- |
| b3 | 1+ | 308.1970 | 308.1969 | -0.3 |
| b4 | 1+ | 391.2340 | 391.2340 | -0.1 |
| b5 | 1+ | 490.3024 | 490.3024 | 0.1 |
| b6 | 1+ | 573.3393 | 573.3395 | 0.3 |
| b7 | 1+ | 642.3608 | 642.3610 | 0.2 |
| b8 | 1+ | 711.3798 | 711.3824 | 3.7 |
| b11 | 1+ | 1056.5176 | 1056.5183 | 0.6 |
| b12 | 1+ | 1155.5871 | 1155.5867 | -0.4 |
| b13 | 1+ | 1226.6246 | 1226.6238 | -0.6 |
| b13 | 2+ | 613.8159 | 613.8155 | -0.6 |
| b14 | 1+ | 1339.7089 | 1339.7079 | -0.8 |
| b14 | 2+ | 670.3570 | 670.3576 | 0.9 |
| b15 | 1+ | 1438.7780 | 1438.7763 | -1.2 |
| b15 | 2+ | 719.8912 | 719.8918 | 0.7 |
| b16 | 1+ | 1509.8152 | 1509.8134 | -1.2 |
| b16 | 2+ | 755.4104 | 755.4103 | 0.0 |
| b17 | 1+ | 1580.8521 | 1580.8505 | -1.0 |
| b17 | 2+ | 790.9286 | 790.9289 | 0.4 |
| b18 | 1+ | 1651.8889 | 1651.8876 | -0.8 |
| b18 | 2+ | 826.4475 | 826.4475 | -0.1 |
| b19 | 1+ | 1750.9592 | 1750.9560 | -1.8 |
| b19 | 2+ | 875.9814 | 875.9817 | 0.3 |
| b20 | 1+ | 1833.9915 | 1833.9932 | 0.9 |
| b21 | 1+ | 1905.0320 | 1905.0303 | -0.9 |
| b21 | 2+ | 953.0186 | 953.0188 | 0.2 |
| y16 | 1+ | 1452.7304 | 1452.7304 | 0.0 |
| y15 | 1+ | 1353.6619 | 1353.6620 | 0.1 |
| y14 | 1+ | 1282.6257 | 1282.6249 | -0.6 |
| y13 | 1+ | 1169.5415 | 1169.5408 | -0.6 |
| y12 | 1+ | 1070.4727 | 1070.4724 | -0.3 |
| y11 | 1+ | 999.4353 | 999.4353 | -0.1 |
| y10 | 1+ | 928.3977 | 928.3982 | 0.5 |
| y9 | 1+ | 857.3611 | 857.3611 | 0.0 |
| y8 | 1+ | 758.2926 | 758.2926 | -0.1 |
| y7 | 1+ | 675.2556 | 675.2555 | -0.1 |
| y6 | 1+ | 604.2184 | 604.2184 | 0.1 |

Table S2. Chemical shifts of NMR analysis of **1**.

| **Residue** | **Position** | **dCa** | **dH mult (*J* in Hz)a** |
| --- | --- | --- | --- |
| NMe2-Ile-1 | 1 | 166.9, C |  |
|  | 2 | 72.8, CH | 3.88* |
|  | 3 | 34.8, CH | 2.17* |
|  | 4 | 27.2, CH2 | 1.71, br m; 1.37, br m |
|  | 5 | 13.5, CH3 | 1.05, d, 6.8 |
|  | 6 | 11.8, CH3 | 1.07* |
|  | N*(CH3)*2 | 42.5, 2 x CH3 | 2.92, s |
| Dhb-2 | 1 | 166.2, C |  |
|  | 2 | 131.7, C |  |
|  | 3 | 128.5, CH | 6.44, q, 7.2 |
|  | 4 | 13.3, CH3 | 1.88, d, 7.2 |
|  | NH |  | 10.16 br s |
| Dhb-3 | 1 | 166.8, C |  |
|  | 2 | 131.1, C |  |
|  | 3 | 132.8, CH | 6.67, q, 7.2 |
|  | 4 | 13.4, CH3 | 1.88, d, 7.2 |
|  | NH |  | 9.80, br s |
| Dhb-4 | 1 | 175.1, C |  |
|  | 2 | 129.5, C |  |
|  | 3 | 131.0, CH | 6.63, q, 7.2 |
|  | 4 | 13.4, CH3 | 1.81, d, 7.2 |
|  | NH |  | 9.16, br s |
| Val-5 | 1 | 174.6, C |  |
|  | 2 | 65.5, CH | 3.73, d, 9.8 |
|  | 3 | 30.4, CH | 2.38, br m |
|  | 4 | 21.1, CH3 | 1.12, d, 6.4 |
|  | 5 | 19.7, CH3 | 0.91, d, 6.4 |
|  | NH | 7.97 | br s |
| Dhb-6 | 1 | 168.2, C |  |
|  | 2 | 131.0, C |  |
|  | 3 | 131.5, CH | 6.55, q, 7.2 |
|  | 4 | 13.4, CH3 | 1.82, d, 7.2 |
|  | NH |  | 9.22, br s |
| Aaa-7 | 1 | 172.1, C |  |
|  | 2 | 99.6, CH | 5.44, d, 7.3 |
|  | 3 | 135.8, CH | 7.20, d, 7.3 |
|  | NH |  | 10.21, b, s |
| Dha-8 | 1 | 169.2, C |  |
|  | 2 | 139.2, C |  |
|  | 3 | 109.6, CH2 | 5.52, br s; 5.33, br s |
|  | NH |  | 9.68, br s |
| Glu-9 | 1 | 176.7, C |  |
|  | 2 | 57.8, CH | 4.12* |
|  | 2 | 26.5, CH2 | 2.15* |
|  | 3 | 31.3, CH2 | 2.57, t, 6.9 |
|  | 5 | 176.1, C |  |
|  | OH |  | 8.38, br s |
|  | NH |  | 9.06, br d, 4.4 |
| Ile-10 | 1 | 174.7, C |  |
|  | 2 | 63.3, CH | 3.87* |
|  | 3 | 36.4, CH | 2.21* |
|  | 4 | 27.8, CH2 | 1.75*; 1.34* |
|  | 5 | 13.6, CH3 | 1.03* |
|  | 6 | 10.8, CH3 | 0.98* |
|  | NH |  | 7.81, br d, 6.4 |
| Ala(S1)-11 | 1 | 172.9, C |  |
|  | 2 | 56.6, CH | 4.45, br m |
|  | 3 | 33.8, CH2 | 3.34*; 2.88* |
|  | NH |  | 7.92, br s |
| Val-12 | 1 | 175.5, C |  |
|  | 1 | 66.0, CH | 3.45, dd, 10.6, 4.6 |
|  | 2 | 30.4, CH | 2.16* |
|  | 3 | 21.1, CH3 | 1.03, d, 6.6 |
|  | 4 | 19.6, CH3 | 0.99, d, 6.4 |
|  | NH |  | 7.91, br s |
| Ala-13 | 1 | 173.3, C |  |
|  | 1 | 50.7, CH | 3.85* |
|  | 2 | 15.3, CH3 | 1.41, d, 7.3 |
|  | NH |  | 8.85, br s |
| Leu-14 | 1 | 174.6, C |  |
|  | 2 | 57.1, CH | 4.10* |
|  | 3 | 41.1, CH2 | 1.97*; 1.51* |
|  | 4 | 25.5, CH | 1.96* |
|  | 5 | 24.0, CH3 | 0.90, d, 6.5 |
|  | 6 | 21.4, CH3 | 0.90, d, 6.5 |
|  | NH |  | 8.23, br s |
| Val-15 | 1 | 173.9, C |  |
|  | 2 | 65.4, CH | 3.69* |
|  | 3 | 30.5, CH | 2.24* |
|  | 4 | 21.2, CH3 | 1.10, d, 7.8 |
|  | 5 | 19.7, CH3 | 1.07, d, 7.8 |
|  | NH |  | 8.01, br d, 5.8 |
| Ala-16 | 1 | 175.5, C |  |
|  | 2 | 53.8, CH | 3.93* |
|  | 3 | 16.8, CH3 | 1.48, d, 7.32 |
|  | NH | n.a |  |
| Ala-17 | 1 | 174.2, C |  |
|  | 2 | 50.8, CH | 4.06* |
|  | 3 | 14.7, CH3 | 1.45, d, 6.9 |
|  | NH |  | 8.44, br d, 7.24 |
| Ala-18 | 1 | 175.6, C |  |
|  | 2 | 50.8, CH | 3.97* |
|  | 3 | 14.8, CH3 | 1.46* |
|  | NH |  | 7.85 br s |
| Val-19 | 1 | C |  |
|  | 2 | 65.5, CH | 3.75* |
|  | 3 | 30.5, CH | 2.24* |
|  | 4 | 21.2, CH3 | 1.09, d, 7.8 |
|  | 5 | 19.7, CH3 | 1.06, d, 7.8 |
|  | NH | n.a | 8.55, br s |
| Dhb-20 | 1 | 169.0, C |  |
|  | 2 | 132.5, C |  |
|  | 3 | 129.4, CH | 6.46, q, 7.2 |
|  | 4 | 12.8, CH3 | 1.79, d, 7.5 |
|  | NH |  | 9.60, br s |
| Ala-21 | 1 | 178.5.0, C |  |
|  | 2 | 53.9, CH | 4.21, q, 7.5 |
|  | 3 | 16.7, CH3 | 1.56, d, 7.3 |
|  | NH |  | 8.47, br s |
| Abu(S2)-22 | 1 | 173.6, C |  |
|  | 2 | 57.9, CH | 3.64* |
|  | 3 | 43.6, CH | 3.62* |
|  | 4 | 19.8, CH3 | 1.26,d, 6.2 |
|  | NH |  | 8.42, br d, 8.7 |
| Trp-23 | 1 | 178.5, C |  |
|  | 2 | 59.6, CH | 4.38, br m |
|  | 3 | 28.0, CH2 | 3.28, br m; 3.25, br m |
|  | 4 | 110.2, CH |  |
|  | 5 | 128.5, CH |  |
|  | 6 | 119.0, CH | 7.53, dd, 7.80, 7.5 |
|  | 7 | 119.97, CH | 6.99, dd, 7.9, 7.5 |
|  | 8 | 122.5, CH | 7.06, dd, 7.8, 7.5 |
|  | 9 | 112.4, CH | 7.29, d, 8.6 |
|  | 10 | 138.2, C |  |
|  | 11 | 124.8, CH | 7.60, s |
|  | NH |  | 9.0, br s |
|  | NH-indole |  | 10.3, br d, 9.7 |
| Asp-24 | 1 | 174.7, C |  |
|  | 2 | 54.2, CH | 4.50, dd, 10.7, 3.5 |
|  | 3 | 36.2, CH2 | 3.06, dd, 16.6, 10.7; 2.80, br d, 16.6 |
|  | 4 | 174.5, C |  |
|  | OH |  | n.a |
|  | NH |  | n.a |
| Ser-25 | 1 | 175.4, C |  |
|  | 2 | 57.0, CH | 4.60, br m |
|  | 3 | 63.5, CH2 | 3.97, bm; 3.79, br m |
|  | NH |  | 8.03, br d, 9.1 |
|  | OH |  | 8.37, br s |
| Gly-26 | 1 | 172.1, C |  |
|  | 2 | 46.0, CH2 | 3.95* |
|  | NH |  | n.a |
| Aminoethane-1,2-dithiol(S1, S2)-27 | 1 | 60.0, CH | 3.89, br m |
|  | 2 | 33.4, CH2 | 3.10, br m; 2.89, br m |
|  | NH |  | 7.96, br s |

[a] overlapping with other isochronous 13C, 1H signals

* No multiplicity is given for 1H-NMR signals for which coupling constants (*J*s) could not be measured directly in 1H or determined from HSQC

n.a No data is given for 1H NMR for which no chemical shift was visible from either CD3OD or CD3OH

Table S3. The retention time comparison of derivatized standard amino acids and amino acid residues from kintamdin after acidic hydrolysis.

| RT/min | D-AAs | L-AAs | 2.5kDa | Configuration |
| --- | --- | --- | --- | --- |
| Trp | 13.8 | 12.8 | 12.80 | L |
| Asp | 10.5 | 9.63 | 9.92 | L |
| Glu | 11.8 | 10.9 | 10.70 | L |
| Ile | 14.69 | 12.57 | 12.50 | L |
| Leu | 15.4 | 14.99 | 15.00 | L |
| Val | 13.86 | 11.75 | 11.74 | L |
| Ser | 10.15 | 9.78 | 9.92 | L |
| Ala | 12.00 | 10.8 | 10.81 | L: D=2:3 |

Table S4. Computational calculation of distances of key correlations in NOE among eight diastereoisomers in **1**.

Key to tables:

- **Green bold font lines** = mean distances agreeing with nOe predictions (including those within 1 standard deviation of the limits).
- Green normal font lines = mean distances agreeing within 2 standard deviations of nOe limits.
- Green individual numbers = minimum observed distances indicating that this interaction could yield the observed nOe signal if averaged over longer simulations.
- Black normal font = distance monitors outwith nOe limits during the current simulation timescale.
- Highlighted lines = long range nOe interaction observed between side chain Aaa-7 residue and the methyl group of the Abu(S2)-22 residue comprising part of the dithiol bridge system.
- The order of three stereogenic centres are from aminoethane 1,2 dithiol (S1, S2) (AD) residue, to Abu(S2) (AB) residue through the β-methyl group (BM).

*R* (AD)-*R* (BM)-*R* (AB): GFN2-xTB molecular dynamics distance monitors.

| nOe | Strength | Min. | Max. | Mean | S.D. |
| --- | --- | --- | --- | --- | --- |
| **Ile-1 (NMe) – Dhb-2 (NH)** | **1.8-5.0** | **2.69** | **4.89** | **4.22** | **0.35** |
| **Ile-1 (Hα) – Dhb-2 (NH)** | **1.8-3.0** | **1.64** | **3.20** | **2.43** | **0.22** |
| **Ile-1 (Hβ) – Dhb-2 (NH)** | **1.8-5.0** | **3.32** | **4.64** | **3.96** | **0.19** |
| Dhb-4 (Hβ) – Val-5 (NH) | 1.8-3.0 | 3.31 | 4.63 | 4.13 | 0.18 |
| **Dhb-6 (NH) – Dhb-6 (Me)** | **1.8-3.0** | **1.88** | **3.56** | **2.62** | **0.30** |
| **Dha-8 (NH) – Dha-8 (Hβ)** | **1.8-3.0** | **1.81** | **3.36** | **2.37** | **0.18** |
| Glu-9 (NH) – Dha-8 (Hβ) | 1.8-4.0 | 3.28 | 4.82 | 4.31 | 0.23 |
| Ile-10 (NH) – Glu-9 (Hα) | 1.8-3.0 | 2.87 | 3.75 | 3.37 | 0.12 |
| Ile-10 (NH) – Val-12 (Hα) | 1.8-3.0 | 6.33 | 7.62 | 6.93 | 0.20 |
| Glu-9 (Hα) – Val-12 (Hα) | 1.8-3.0 | 4.08 | 5.84 | 4.80 | 0.26 |
| **Ala(S1)-11 (Hα) – Glu-9 (Hα)** | **1.8-4.0** | **1.73** | **4.17** | **2.80** | **0.31** |
| **Val-12 (Hα) – D-Ala-13 (NH)** | **1.8-3.0** | **1.73** | **2.84** | **2.15** | **0.15** |
| **D-Ala-13 (Hα) – Leu-14 (NH)** | **1.8-5.0** | **3.09** | **3.93** | **3.57** | **0.10** |
| **Dhb-20 (NH) – Val-19 (Hβ)** | **1.8-3.0** | **1.79** | **3.51** | **2.44** | **0.28** |
| **Dhb-20 (NH) – Val-19 (Hα)** | **1.8-5.0** | **3.24** | **3.86** | **3.55** | **0.09** |
| **Abu(S2)-22 (NH) – Ala-21 (Hα)** | **1.8-5.0** | **3.19** | **3.81** | **3.50** | **0.10** |
| Abu(S2)-22 (NH) – Abu(S2)-22 (Hβ) | 1.8-3.0 | 3.11 | 4.07 | 3.72 | 0.13 |
| **Abu(S2)-22 (NH) – Abu(S2)-22 (Hα)** | **1.8-3.0** | **1.92** | **2.59** | **2.23** | **0.10** |
| **Trp-23 (NH) – Abu(S2)-22 (Hα)** | **1.8-4.0** | **2.46** | **3.74** | **3.31** | **0.20** |
| **Trp-23 (NH) – Trp-23 (Hα)** | **1.8-4.0** | **2.57** | **3.09** | **2.92** | **0.07** |
| **Trp-23 (NH) – Trp-23 (Hβ)** | **1.8-4.0** | **1.76** | **2.92** | **2.36** | **0.22** |
| **Ser-25 (NH) – Ser-25 (Hβ)** | **1.8-5.0** | **2.12** | **2.92** | **2.59** | **0.13** |
| **Aminoethane-1,2-dithiol(S1, S2) (NH) – Aminoethane-1,2-dithiol(S1, S2) (Hα)** | 1.8-3.0 | **1.87** | **2.52** | **2.21** | **0.10** |
| Aminoethane-1,2-dithiol(S1, S2) (NH) – Ala(S1)-11 (Hβ) | 1.8-3.0 | 3.21 | 4.46 | 3.75 | 0.18 |
| Ala(S1)-11 (NH) – Aminoethane-1,2-dithiol(S1, S2) (Hα) | 1.8-4.0 | 3.90 | 5.05 | 4.46 | 0.17 |
| **Ala(S1)-11 (NH) – Ala(S1)-11 (Hβ)** | **1.8-3.0** | **2.21** | **2.88** | **2.59** | **0.10** |
| **Ala(S1)-11 (NH) – Aminoethane-1,2-dithiol(S1, S2) (Hα)** | **1.8-4.0** | **2.50** | **3.05** | **2.86** | **0.08** |
| **Abu(S2)-22 (Hα) – Abu(S2)-22 (Hβ)** | **1.8-3.0** | **2.86** | **3.20** | **3.03** | **0.05** |
| Leu-14 (Hγ) – Aminoethane-1,2-dithiol(S1, S2) (Hα) | 1.8-5.0 | 6.33 | 11.08 | 8.73 | 0.89 |
| Asp-24 (Hβ) – Ala-21 (Me) | 1.8-4.0 | 3.86 | 6.68 | 5.02 | 0.49 |
| **Dhb-20 (NH) – Dhb-20 (Me)** | **1.8-5.0** | **3.71** | **4.22** | **4.02** | **0.07** |
| **Leu-14 (NH) – Leu-14 (Hγ)** | **1.8-3.0** | **1.71** | **4.85** | **3.90** | **0.91** |
| **Leu-14 (NH) – Leu-14 (Hα)** | **1.8-3.0** | **2.16** | **3.05** | **2.74** | **0.13** |
| **Ile-10 (NH) – Ile-10 (Hγ)** | **1.8-5.0** | **3.09** | **3.92** | **3.56** | **0.11** |
| Aaa-7 (CH) – Abu(S2)-22 (Me) | 1.8-5.0 | 13.40 | 16.74 | 15.23 | 0.48 |

*R* (AD)-*R* (BM)-*S* (AB): GFN2-xTB molecular dynamics distance monitors.

| nOe | Strength | Min. | Max. | Mean | S.D. |
| --- | --- | --- | --- | --- | --- |
| **Ile-1 (NMe) – Dhb-2 (NH)** | **1.8-5.0** | **2.45** | **4.86** | **3.64** | **0.41** |
| **Ile-1 (Hα) – Dhb-2 (NH)** | **1.8-3.0** | **1.76** | **3.12** | **2.34** | **0.23** |
| **Ile-1 (Hβ) – Dhb-2 (NH)** | **1.8-5.0** | **3.47** | **4.69** | **4.09** | **0.18** |
| **Dhb-4 (Hβ) – Val-5 (NH)** | **1.8-3.0** | **1.68** | **3.57** | **2.50** | **0.32** |
| **Dhb-6 (NH) – Dhb-6 (Me)** | **1.8-3.0** | **1.64** | **2.71** | **2.20** | **0.15** |
| **Dha-8 (NH) – Dha-8 (Hβ)** | **1.8-3.0** | **1.79** | **2.91** | **2.34** | **0.16** |
| **Glu-9 (NH) – Dha-8 (Hβ)** | **1.8-4.0** | **2.69** | **4.65** | **4.08** | **0.27** |
| Ile-10 (NH) – Glu-9 (Hα) | 1.8-3.0 | 3.21 | 3.83 | 3.51 | 0.09 |
| Ile-10 (NH) – Val-12 (Hα) | 1.8-3.0 | 6.36 | 7.77 | 6.98 | 0.21 |
| Glu-9 (Hα) – Val-12 (Hα) | 1.8-3.0 | 4.18 | 6.27 | 5.09 | 0.32 |
| **Ala(S1)-11 (Hα) – Glu-9 (Hα)** | **1.8-4.0** | **2.58** | **4.89** | **3.70** | **0.32** |
| **Val-12 (Hα) – D-Ala-13 (NH)** | **1.8-3.0** | **1.55** | **2.80** | **2.18** | **0.15** |
| **D-Ala-13 (Hα) – Leu-14 (NH)** | **1.8-5.0** | **1.84** | **3.81** | **2.92** | **0.53** |
| **Dhb-20 (NH) – Val-19 (Hβ)** | **1.8-3.0** | **2.02** | **4.51** | **3.48** | **0.68** |
| **Dhb-20 (NH) – Val-19 (Hα)** | **1.8-5.0** | **2.99** | **3.87** | **3.49** | **0.11** |
| **Abu(S2)-22 (NH) – Ala-21 (Hα)** | **1.8-5.0** | **3.25** | **3.88** | **3.55** | **0.11** |
| Abu(S2)-22 (NH) – Abu(S2)-22 (Hβ) | 1.8-3.0 | 3.30 | 4.15 | 3.74 | 0.14 |
| **Abu(S2)-22 (NH) – Abu(S2)-22 (Hα)** | **1.8-3.0** | **2.52** | **3.10** | **2.90** | **0.07** |
| **Trp-23 (NH) – Abu(S2)-22 (Hα)** | **1.8-4.0** | **2.89** | **3.78** | **3.45** | **0.12** |
| **Trp-23 (NH) – Trp-23 (Hα)** | **1.8-4.0** | **2.58** | **3.08** | **2.91** | **0.06** |
| **Trp-23 (NH) – Trp-23 (Hβ)** | **1.8-4.0** | **1.67** | **2.46** | **2.08** | **0.12** |
| **Ser-25 (NH) – Ser-25 (Hβ)** | **1.8-5.0** | **2.24** | **2.91** | **2.59** | **0.11** |
| **Aminoethane-1,2-dithiol(S1, S2) (NH) – Aminoethane-1,2-dithiol(S1, S2) (Hα)** | **1.8-3.0** | **1.92** | **2.67** | **2.24** | **0.10** |
| Aminoethane-1,2-dithiol(S1, S2) (NH) – Ala(S1)-11 (Hβ) | 1.8-3.0 | 2.82 | 4.35 | 3.61 | 0.21 |
| Ala(S1)-11 (NH) – Aminoethane-1,2-dithiol(S1, S2) (Hα) | 1.8-4.0 | 3.74 | 5.07 | 4.46 | 0.19 |
| **Ala(S1)-11 (NH) – Ala(S1)-11 (Hβ)** | **1.8-3.0** | **2.17** | **2.90** | **2.55** | **0.11** |
| **Ala(S1)-11 (NH) – Aminoethane-1,2-dithiol(S1, S2) (Hα)** | **1.8-4.0** | **2.52** | **3.05** | **2.87** | **0.07** |
| **Abu(S2)-22 (Hα) – Abu(S2)-22 (Hβ)** | **1.8-3.0** | **2.04** | **2.73** | **2.42** | **0.11** |
| Leu-14 (Hγ) – Aminoethane-1,2-dithiol(S1, S2) (Hα) | 1.8-5.0 | 3.75 | 11.71 | 8.58 | 1.74 |
| Asp-24 (Hβ) – Ala-21 (Me) | 1.8-4.0 | 3.60 | 7.08 | 5.36 | 0.94 |
| **Dhb-20 (NH) – Dhb-20 (Me)** | **1.8-5.0** | **3.71** | **4.24** | **4.03** | **0.06** |
| **Leu-14 (NH) – Leu-14 (Hγ)** | **1.8-3.0** | **1.63** | **5.08** | **3.62** | **1.05** |
| **Leu-14 (NH) – Leu-14 (Hα)** | **1.8-3.0** | **2.18** | **3.07** | **2.80** | **0.15** |
| **Ile-10 (NH) – Ile-10 (Hγ)** | **1.8-5.0** | **1.78** | **2.74** | **2.29** | **0.14** |
| Aaa-7 (CH) – Abu(S2)-22 (Me) | 1.8-5.0 | 14.34 | 16.54 | 15.48 | 0.31 |

*R* (AD)-*S* (BM)-*R* (AB): GFN2-xTB molecular dynamics distance monitors.

| nOe | Strength | Min. | Max. | Mean | S.D. |
| --- | --- | --- | --- | --- | --- |
| **Ile-1 (NMe) – Dhb-2 (NH)** | **1.8-5.0** | **2.37** | **4.83** | **4.09** | **0.44** |
| **Ile-1 (Hα) – Dhb-2 (NH)** | **1.8-3.0** | **1.83** | **3.41** | **2.46** | **0.24** |
| **Ile-1 (Hβ) – Dhb-2 (NH)** | **1.8-5.0** | **3.32** | **4.69** | **3.92** | **0.22** |
| **Dhb-4 (Hβ) – Val-5 (NH)** | **1.8-3.0** | **1.55** | **4.36** | **2.34** | **0.38** |
| **Dhb-6 (NH) – Dhb-6 (Me)** | **1.8-3.0** | **1.85** | **3.67** | **2.51** | **0.35** |
| **Dha-8 (NH) – Dha-8 (Hβ)** | **1.8-3.0** | **1.87** | **3.02** | **2.44** | **0.17** |
| **Glu-9 (NH) – Dha-8 (Hβ)** | **1.8-4.0** | **2.64** | **4.65** | **3.86** | **0.31** |
| **Ile-10 (NH) – Glu-9 (Hα)** | **1.8-3.0** | **1.61** | **2.69** | **2.11** | **0.17** |
| Ile-10 (NH) – Val-12 (Hα) | 1.8-3.0 | 9.82 | 15.72 | 12.70 | 0.90 |
| Glu-9 (Hα) – Val-12 (Hα) | 1.8-3.0 | 4.03 | 9.31 | 5.84 | 0.96 |
| **Ala(S1)-11 (Hα) – Glu-9 (Hα)** | **1.8-4.0** | **1.55** | **4.00** | **2.82** | **0.40** |
| **Val-12 (Hα) – D-Ala-13 (NH)** | **1.8-3.0** | **1.79** | **3.09** | **2.27** | **0.19** |
| **D-Ala-13 (Hα) – Leu-14 (NH)** | **1.8-5.0** | **1.86** | **3.91** | **2.69** | **0.34** |
| **Dhb-20 (NH) – Val-19 (Hβ)** | **1.8-3.0** | **1.85** | **4.76** | **3.00** | **0.76** |
| **Dhb-20 (NH) – Val-19 (Hα)** | **1.8-5.0** | **2.08** | **3.88** | **3.45** | **0.26** |
| **Abu(S2)-22 (NH) – Ala-21 (Hα)** | **1.8-5.0** | **3.17** | **3.77** | **3.47** | **0.09** |
| Abu(S2)-22 (NH) – Abu(S2)-22 (Hβ) | 1.8-3.0 | 3.35 | 4.17 | 3.79 | 0.13 |
| **Abu(S2)-22 (NH) – Abu(S2)-22 (Hα)** | **1.8-3.0** | **1.95** | **2.64** | **2.32** | **0.10** |
| **Trp-23 (NH) – Abu(S2)-22 (Hα)** | **1.8-4.0** | **1.82** | **3.60** | **2.59** | **0.19** |
| **Trp-23 (NH) – Trp-23 (Hα)** | **1.8-4.0** | **2.61** | **3.12** | **2.93** | **0.06** |
| **Trp-23 (NH) – Trp-23 (Hβ)** | **1.8-4.0** | **1.85** | **2.86** | **2.41** | **0.17** |
| **Ser-25 (NH) – Ser-25 (Hβ)** | **1.8-5.0** | **1.77** | **3.04** | **2.75** | **0.23** |
| **Aminoethane-1,2-dithiol(S1, S2) (NH) – Aminoethane-1,2-dithiol(S1, S2) (Hα)** | **1.8-3.0** | **2.77** | **3.09** | **2.94** | **0.05** |
| Aminoethane-1,2-dithiol(S1, S2) (NH) – Ala(S1)-11 (Hβ) | 1.8-3.0 | 2.64 | 4.20 | 3.61 | 0.23 |
| Ala(S1)-11 (NH) – Aminoethane-1,2-dithiol(S1, S2) (Hα) | 1.8-4.0 | 3.52 | 5.86 | 4.81 | 0.31 |
| **Ala(S1)-11 (NH) – Ala(S1)-11 (Hβ)** | 1.8-3.0 | **1.77** | **2.97** | **2.54** | **0.32** |
| **Ala(S1)-11 (NH) – Aminoethane-1,2-dithiol(S1, S2) (Hα)** | **1.8-4.0** | **1.94** | **3.12** | **2.55** | **0.31** |
| **Abu(S2)-22 (Hα) – Abu(S2)-22 (Hβ)** | **1.8-3.0** | **2.23** | **3.13** | **2.61** | **0.14** |
| Leu-14 (Hγ) – Aminoethane-1,2-dithiol(S1, S2) (Hα) | 1.8-5.0 | 4.66 | 10.63 | 7.71 | 1.21 |
| Asp-24 (Hβ) – Ala-21 (Me) | 1.8-4.0 | 5.01 | 6.86 | 5.83 | 0.25 |
| **Dhb-20 (NH) – Dhb-20 (Me)** | **1.8-5.0** | **3.72** | **4.26** | **4.05** | **0.07** |
| **Leu-14 (NH) – Leu-14 (Hγ)** | **1.8-3.0** | **1.73** | **5.16** | **3.81** | **0.90** |
| **Leu-14 (NH) – Leu-14 (Hα)** | **1.8-3.0** | **1.92** | **3.05** | **2.29** | **0.16** |
| **Ile-10 (NH) – Ile-10 (Hγ)** | **1.8-5.0** | **3.20** | **4.25** | **3.81** | **0.18** |
| Aaa-7 (CH) – Abu(S2)-22 (Me) | 1.8-5.0 | 2.88 | 18.14 | 13.98 | 3.82 |

*R* (AD)-*S* (BM)-*S* (AB): GFN2-xTB molecular dynamics distance monitors.

| nOe | Strength | Min. | Max. | Mean | S.D. |
| --- | --- | --- | --- | --- | --- |
| **Ile-1 (NMe) – Dhb-2 (NH)** | **1.8-5.0** | **3.50** | **4.87** | **4.31** | **0.20** |
| **Ile-1 (Hα) – Dhb-2 (NH)** | **1.8-3.0** | **1.72** | **3.22** | **2.44** | **0.25** |
| **Ile-1 (Hβ) – Dhb-2 (NH)** | **1.8-5.0** | **3.39** | **4.77** | **3.94** | **0.24** |
| **Dhb-4 (Hβ) – Val-5 (NH)** | **1.8-3.0** | **1.55** | **4.64** | **3.60** | **0.76** |
| **Dhb-6 (NH) – Dhb-6 (Me)** | **1.8-3.0** | **1.70** | **2.87** | **2.20** | **0.17** |
| **Dha-8 (NH) – Dha-8 (Hβ)** | **1.8-3.0** | **1.84** | **2.97** | **2.35** | **0.16** |
| **Glu-9 (NH) – Dha-8 (Hβ)** | **1.8-4.0** | **2.74** | **4.59** | **3.90** | **0.33** |
| Ile-10 (NH) – Glu-9 (Hα) | 1.8-3.0 | 3.12 | 3.88 | 3.52 | 0.11 |
| Ile-10 (NH) – Val-12 (Hα) | 1.8-3.0 | 6.89 | 8.21 | 7.51 | 0.20 |
| Glu-9 (Hα) – Val-12 (Hα) | 1.8-3.0 | 5.39 | 8.98 | 6.56 | 0.49 |
| **Ala(S1)-11 (Hα) – Glu-9 (Hα)** | **1.8-4.0** | **2.26** | **4.11** | **3.13** | **0.30** |
| Val-12 (Hα) – D-Ala-13 (NH) | 1.8-3.0 | 2.57 | 3.76 | 3.38 | 0.15 |
| **D-Ala-13 (Hα) – Leu-14 (NH)** | **1.8-5.0** | **1.94** | **3.57** | **2.71** | **0.24** |
| **Dhb-20 (NH) – Val-19 (Hβ)** | 1.8-3.0 | **1.63** | **3.90** | **2.63** | **0.39** |
| **Dhb-20 (NH) – Val-19 (Hα)** | **1.8-5.0** | **3.18** | **3.91** | **3.56** | **0.10** |
| **Abu(S2)-22 (NH) – Ala-21 (Hα)** | **1.8-5.0** | **1.77** | **2.97** | **2.23** | **0.17** |
| Abu(S2)-22 (NH) – Abu(S2)-22 (Hβ) | 1.8-3.0 | 3.05 | 3.93 | 3.57 | 0.12 |
| **Abu(S2)-22 (NH) – Abu(S2)-22 (Hα)** | **1.8-3.0** | **2.44** | **3.07** | **2.84** | **0.10** |
| **Trp-23 (NH) – Abu(S2)-22 (Hα)** | **1.8-4.0** | **1.80** | **3.72** | **2.81** | **0.34** |
| **Trp-23 (NH) – Trp-23 (Hα)** | **1.8-4.0** | **2.24** | **3.39** | **2.79** | **0.20** |
| **Trp-23 (NH) – Trp-23 (Hβ)** | **1.8-4.0** | **2.14** | **2.59** | **2.43** | **0.06** |
| **Ser-25 (NH) – Ser-25 (Hβ)** | **1.8-5.0** | **1.70** | **2.90** | **2.22** | **0.19** |
| **Aminoethane-1,2-dithiol(S1, S2) (NH) – Aminoethane-1,2-dithiol(S1, S2) (Hα)** | **1.8-3.0** | **2.75** | **3.11** | **2.96** | **0.05** |
| Aminoethane-1,2-dithiol(S1, S2) (NH) – Ala(S1)-11 (Hβ) | 1.8-3.0 | 3.03 | 4.41 | 3.68 | 0.22 |
| **Ala(S1)-11 (NH) – Aminoethane-1,2-dithiol(S1, S2) (Hα)** | **1.8-4.0** | **2.30** | **5.20** | **4.18** | **0.47** |
| **Ala(S1)-11 (NH) – Ala(S1)-11 (Hβ)** | **1.8-3.0** | **1.60** | **2.42** | **1.98** | **0.10** |
| **Ala(S1)-11 (NH) – Aminoethane-1,2-dithiol(S1, S2) (Hα)** | **1.8-4.0** | **2.35** | **3.05** | **2.70** | **0.10** |
| **Abu(S2)-22 (Hα) – Abu(S2)-22 (Hβ)** | **1.8-3.0** | **2.15** | **3.07** | **2.56** | **0.14** |
| Leu-14 (Hγ) – Aminoethane-1,2-dithiol(S1, S2) (Hα) | 1.8-5.0 | 6.3 | 11.7 | 8.82 | 0.82 |
| Asp-24 (Hβ) – Ala-21 (Me) | 1.8-4.0 | 3.76 | 6.52 | 4.68 | 0.42 |
| **Dhb-20 (NH) – Dhb-20 (Me)** | **1.8-5.0** | **3.27** | **3.91** | **3.56** | **0.10** |
| Leu-14 (NH) – Leu-14 (Hγ) | 1.8-3.0 | 2.12 | 5.08 | 3.89 | 0.71 |
| **Leu-14 (NH) – Leu-14 (Hα)** | **1.8-3.0** | **1.82** | **2.46** | **2.18** | **0.10** |
| **Ile-10 (NH) – Ile-10 (Hγ)** | **1.8-5.0** | **3.13** | **3.94** | **3.54** | **0.11** |
| Aaa-7 (CH) – Abu(S2)-22 (Me) | 1.8-5.0 | 3.97 | 12.85 | 9.27 | 1.64 |

*S* (AD)-*R* (BM)-*R* (AB): GFN2-xTB molecular dynamics distance monitors.

| nOe | Strength | Min. | Max. | Mean | S.D. |
| --- | --- | --- | --- | --- | --- |
| **Ile-1 (NMe) – Dhb-2 (NH)** | **1.8-5.0** | **2.56** | **4.85** | **3.65** | **0.32** |
| **Ile-1 (Hα) – Dhb-2 (NH)** | **1.8-3.0** | **1.76** | **3.07** | **2.36** | **0.19** |
| **Ile-1 (Hβ) – Dhb-2 (NH)** | **1.8-5.0** | **3.45** | **4.61** | **4.10** | **0.17** |
| Dhb-4 (Hβ) – Val-5 (NH) | 1.8-3.0 | 2.95 | 4.66 | 4.19 | 0.20 |
| **Dhb-6 (NH) – Dhb-6 (Me)** | **1.8-3.0** | **1.74** | **2.87** | **2.30** | **0.17** |
| **Dha-8 (NH) – Dha-8 (Hβ)** | **1.8-3.0** | **1.86** | **3.09** | **2.40** | **0.18** |
| **Glu-9 (NH) – Dha-8 (Hβ)** | **1.8-4.0** | **3.20** | **4.66** | **4.13** | **0.26** |
| **Ile-10 (NH) – Glu-9 (Hα)** | **1.8-3.0** | **2.10** | **3.90** | **3.19** | **0.43** |
| Ile-10 (NH) – Val-12 (Hα) | 1.8-3.0 | 4.69 | 7.70 | 6.26 | 0.73 |
| Glu-9 (Hα) – Val-12 (Hα) | 1.8-3.0 | 3.98 | 6.74 | 5.21 | 0.47 |
| **Ala(S1)-11 (Hα) – Glu-9 (Hα)** | **1.8-4.0** | **2.41** | **5.19** | **3.96** | **0.47** |
| **Val-12 (Hα) – D-Ala-13 (NH)** | **1.8-3.0** | **1.70** | **2.92** | **2.20** | **0.17** |
| **D-Ala-13 (Hα) – Leu-14 (NH)** | **1.8-5.0** | **2.00** | **3.83** | **3.08** | **0.31** |
| **Dhb-20 (NH) – Val-19 (Hβ)** | **1.8-3.0** | **1.87** | **4.47** | **2.64** | **0.37** |
| **Dhb-20 (NH) – Val-19 (Hα)** | **1.8-5.0** | **2.49** | **3.82** | **3.50** | **0.14** |
| **Abu(S2)-22 (NH) – Ala-21 (Hα)** | **1.8-5.0** | **2.74** | **3.83** | **3.39** | **0.14** |
| Abu(S2)-22 (NH) – Abu(S2)-22 (Hβ) | 1.8-3.0 | 3.30 | 4.17 | 3.82 | 0.13 |
| **Abu(S2)-22 (NH) – Abu(S2)-22 (Hα)** | **1.8-3.0** | **1.95** | **2.55** | **2.24** | **0.09** |
| **Trp-23 (NH) – Abu(S2)-22 (Hα)** | **1.8-4.0** | **2.33** | **3.50** | **2.97** | **0.17** |
| **Trp-23 (NH) – Trp-23 (Hα)** | **1.8-4.0** | **2.51** | **3.05** | **2.84** | **0.08** |
| **Trp-23 (NH) – Trp-23 (Hβ)** | **1.8-4.0** | **1.66** | **2.37** | **2.02** | **0.10** |
| **Ser-25 (NH) – Ser-25 (Hβ)** | **1.8-5.0** | **1.72** | **3.00** | **2.30** | **0.25** |
| **Aminoethane-1,2-dithiol(S1, S2) (NH) – Aminoethane-1,2-dithiol(S1, S2) (Hα)** | **1.8-3.0** | **2.76** | **3.08** | **2.94** | **0.05** |
| Aminoethane-1,2-dithiol(S1, S2) (NH) – Ala(S1)-11 (Hβ) | 1.8-3.0 | 3.46 | 4.48 | 4.05 | 0.15 |
| **Ala(S1)-11 (NH) – Aminoethane-1,2-dithiol(S1, S2) (Hα)** | **1.8-4.0** | **1.68** | **3.95** | **2.58** | **0.35** |
| **Ala(S1)-11 (NH) – Ala(S1)-11 (Hβ)** | **1.8-3.0** | **2.22** | **3.01** | **2.70** | **0.13** |
| **Ala(S1)-11 (NH) – Aminoethane-1,2-dithiol(S1, S2) (Hα)** | **1.8-4.0** | **1.90** | **2.58** | **2.24** | **0.11** |
| **Abu(S2)-22 (Hα) – Abu(S2)-22 (Hβ)** | **1.8-3.0** | **2.69** | **3.17** | **2.98** | **0.07** |
| Leu-14 (Hγ) – Aminoethane-1,2-dithiol(S1, S2) (Hα) | 1.8-5.0 | 4.51 | 9.30 | 6.70 | 0.81 |
| Asp-24 (Hβ) – Ala-21 (Me) | 1.8-4.0 | 4.83 | 6.54 | 5.65 | 0.26 |
| **Dhb-20 (NH) – Dhb-20 (Me)** | **1.8-5.0** | **3.81** | **4.25** | **4.03** | **0.07** |
| **Leu-14 (NH) – Leu-14 (Hγ)** | **1.8-3.0** | **1.93** | **5.06** | **3.50** | **0.67** |
| **Leu-14 (NH) – Leu-14 (Hα)** | **1.8-3.0** | **1.88** | **2.60** | **2.24** | **0.10** |
| **Ile-10 (NH) – Ile-10 (Hγ)** | **1.8-5.0** | **1.76** | **3.67** | **2.60** | **0.42** |
| Aaa-7 (CH) – Abu(S2)-22 (Me) | 1.8-5.0 | 10.69 | 16.18 | 14.19 | 0.88 |

*S* (AD)-*R* (BM)-*S* (AB): GFN2-xTB molecular dynamics distance monitors.

| nOe | Strength | Min. | Max. | Mean | S.D. |
| --- | --- | --- | --- | --- | --- |
| **Ile-1 (NMe) – Dhb-2 (NH)** | **1.8-5.0** | **2.91** | **4.85** | **3.98** | **0.38** |
| **Ile-1 (Hα) – Dhb-2 (NH)** | **1.8-3.0** | **1.68** | **3.41** | **2.35** | **0.24** |
| **Ile-1 (Hβ) – Dhb-2 (NH)** | **1.8-5.0** | **1.59** | **3.66** | **2.40** | **0.34** |
| **Dhb-4 (Hβ) – Val-5 (NH)** | **1.8-3.0** | **1.84** | **4.56** | **3.10** | **0.69** |
| **Dhb-6 (NH) – Dhb-6 (Me)** | **1.8-3.0** | **1.75** | **3.99** | **3.25** | **0.38** |
| **Dha-8 (NH) – Dha-8 (Hβ)** | **1.8-3.0** | **1.91** | **3.20** | **2.42** | **0.17** |
| **Glu-9 (NH) – Dha-8 (Hβ)** | **1.8-4.0** | **2.13** | **4.72** | **3.66** | **0.46** |
| **Ile-10 (NH) – Glu-9 (Hα)** | **1.8-3.0** | **1.75** | **2.79** | **2.22** | **0.16** |
| Ile-10 (NH) – Val-12 (Hα) | 1.8-3.0 | 4.45 | 6.77 | 5.24 | 0.35 |
| Glu-9 (Hα) – Val-12 (Hα) | 1.8-3.0 | 4.09 | 6.87 | 5.27 | 0.49 |
| **Ala(S1)-11 (Hα) – Glu-9 (Hα)** | **1.8-4.0** | **2.41** | **4.46** | **3.46** | **0.29** |
| **Val-12 (Hα) – D-Ala-13 (NH)** | **1.8-3.0** | **1.71** | **2.64** | **2.17** | **0.14** |
| **D-Ala-13 (Hα) – Leu-14 (NH)** | **1.8-5.0** | **2.12** | **3.66** | **2.92** | **0.22** |
| Dhb-20 (NH) – Val-19 (Hβ) | 1.8-3.0 | 2.00 | 4.62 | 3.97 | 0.28 |
| Dhb-20 (NH) – Val-19 (Hα) | 1.8-5.0 | 1.81 | 2.86 | 2.24 | 0.14 |
| **Abu(S2)-22 (NH) – Ala-21 (Hα)** | **1.8-5.0** | **2.01** | **3.83** | **3.31** | **0.35** |
| Abu(S2)-22 (NH) – Abu(S2)-22 (Hβ) | 1.8-3.0 | 3.37 | 4.18 | 3.79 | 0.13 |
| **Abu(S2)-22 (NH) – Abu(S2)-22 (Hα)** | **1.8-3.0** | **2.59** | **3.11** | **2.94** | **0.06** |
| **Trp-23 (NH) – Abu(S2)-22 (Hα)** | **1.8-4.0** | **2.79** | **3.91** | **3.43** | **0.16** |
| **Trp-23 (NH) – Trp-23 (Hα)** | **1.8-4.0** | **2.40** | **3.07** | **2.86** | **0.09** |
| **Trp-23 (NH) – Trp-23 (Hβ)** | **1.8-4.0** | **1.66** | **2.43** | **2.04** | **0.12** |
| **Ser-25 (NH) – Ser-25 (Hβ)** | **1.8-5.0** | **1.90** | **3.00** | **2.52** | **0.18** |
| **Aminoethane-1,2-dithiol(S1, S2) (NH) – Aminoethane-1,2-dithiol(S1, S2) (Hα)** | **1.8-3.0** | **1.99** | **2.58** | **2.24** | **0.09** |
| **Aminoethane-1,2-dithiol(S1, S2) (NH) – Ala(S1)-11 (Hβ)** | **1.8-3.0** | **2.02** | **3.87** | **2.88** | **0.31** |
| Ala(S1)-11 (NH) – Aminoethane-1,2-dithiol(S1, S2) (Hα) | 1.8-4.0 | 4.72 | 6.71 | 5.66 | 0.33 |
| **Ala(S1)-11 (NH) – Ala(S1)-11 (Hβ)** | **1.8-3.0** | **2.16** | **2.95** | **2.66** | **0.11** |
| **Ala(S1)-11 (NH) – Aminoethane-1,2-dithiol(S1, S2) (Hα)** | **1.8-4.0** | **1.90** | **2.62** | **2.26** | **0.10** |
| **Abu(S2)-22 (Hα) – Abu(S2)-22 (Hβ)** | **1.8-3.0** | **2.05** | **2.80** | **2.43** | **0.11** |
| Leu-14 (Hγ) – Aminoethane-1,2-dithiol(S1, S2) (Hα) | 1.8-5.0 | 3.98 | 8.40 | 6.23 | 0.95 |
| **Asp-24 (Hβ) – Ala-21 (Me)** | **1.8-4.0** | **2.73** | **7.04** | **5.65** | **0.84** |
| **Dhb-20 (NH) – Dhb-20 (Me)** | **1.8-5.0** | **3.42** | **4.26** | **4.02** | **0.10** |
| **Leu-14 (NH) – Leu-14 (Hγ)** | **1.8-3.0** | **1.93** | **3.97** | **2.93** | **0.29** |
| **Leu-14 (NH) – Leu-14 (Hα)** | **1.8-3.0** | **1.92** | **2.57** | **2.22** | **0.10** |
| **Ile-10 (NH) – Ile-10 (Hγ)** | **1.8-5.0** | **2.34** | **3.77** | **3.24** | **0.17** |
| Aaa-7 (CH) – Abu(S2)-22 (Me) | 1.8-5.0 | 12.12 | 18.80 | 15.33 | 1.41 |

*S* (AD)-*S* (BM)-*R* (AB): GFN2-xTB molecular dynamics distance monitors.

| nOe | Strength | Min. | Max. | Mean | S.D. |
| --- | --- | --- | --- | --- | --- |
| **Ile-1 (NMe) – Dhb-2 (NH)** | **1.8-5.0** | **2.77** | **4.33** | **3.60** | **0.23** |
| **Ile-1 (Hα) – Dhb-2 (NH)** | **1.8-3.0** | **1.68** | **2.82** | **2.30** | **0.16** |
| **Ile-1 (Hβ) – Dhb-2 (NH)** | **1.8-5.0** | **1.80** | **3.83** | **2.67** | **0.31** |
| Dhb-4 (Hβ) – Val-5 (NH) | 1.8-3.0 | 1.76 | 4.67 | 3.81 | 0.54 |
| **Dhb-6 (NH) – Dhb-6 (Me)** | **1.8-3.0** | **1.68** | **3.68** | **2.42** | **0.37** |
| Dha-8 (NH) – Dha-8 (Hβ) | 1.8-3.0 | 3.20 | 3.96 | 3.65 | 0.11 |
| Glu-9 (NH) – Dha-8 (Hβ) | 1.8-4.0 | 3.51 | 4.82 | 4.39 | 0.16 |
| **Ile-10 (NH) – Glu-9 (Hα)** | **1.8-3.0** | **1.74** | **2.67** | **2.15** | **0.14** |
| Ile-10 (NH) – Val-12 (Hα) | 1.8-3.0 | 4.12 | 6.41 | 4.92 | 0.30 |
| Glu-9 (Hα) – Val-12 (Hα) | 1.8-3.0 | 4.16 | 7.13 | 5.21 | 0.50 |
| **Ala(S1)-11 (Hα) – Glu-9 (Hα)** | **1.8-4.0** | **2.59** | **4.59** | **3.51** | **0.28** |
| **Val-12 (Hα) – D-Ala-13 (NH)** | **1.8-3.0** | **1.77** | **2.78** | **2.21** | **0.15** |
| **D-Ala-13 (Hα) – Leu-14 (NH)** | **1.8-5.0** | **1.91** | **3.68** | **2.57** | **0.26** |
| **Dhb-20 (NH) – Val-19 (Hβ)** | 1.8-3.0 | **1.72** | **4.31** | **2.53** | **0.35** |
| **Dhb-20 (NH) – Val-19 (Hα)** | **1.8-5.0** | **2.94** | **3.94** | **3.53** | **0.11** |
| **Abu(S2)-22 (NH) – Ala-21 (Hα)** | **1.8-5.0** | **2.94** | **3.96** | **3.57** | **0.12** |
| Abu(S2)-22 (NH) – Abu(S2)-22 (Hβ) | 1.8-3.0 | 3.48 | 4.26 | 3.97 | 0.11 |
| **Abu(S2)-22 (NH) – Abu(S2)-22 (Hα)** | **1.8-3.0** | **1.92** | **2.68** | **2.30** | **0.11** |
| **Trp-23 (NH) – Abu(S2)-22 (Hα)** | **1.8-4.0** | **2.14** | **3.26** | **2.78** | **0.17** |
| **Trp-23 (NH) – Trp-23 (Hα)** | **1.8-4.0** | **2.70** | **3.10** | **2.94** | **0.05** |
| **Trp-23 (NH) – Trp-23 (Hβ)** | **1.8-4.0** | **1.80** | **2.54** | **2.17** | **0.12** |
| **Ser-25 (NH) – Ser-25 (Hβ)** | **1.8-5.0** | **2.37** | **3.02** | **2.79** | **0.09** |
| **Aminoethane-1,2-dithiol(S1, S2) (NH) – Aminoethane-1,2-dithiol(S1, S2) (Hα)** | **1.8-3.0** | **2.65** | **3.10** | **2.92** | **0.06** |
| Aminoethane-1,2-dithiol(S1, S2) (NH) – Ala(S1)-11 (Hβ) | 1.8-3.0 | 3.09 | 4.24 | 3.73 | 0.18 |
| Ala(S1)-11 (NH) – Aminoethane-1,2-dithiol(S1, S2) (Hα) | 1.8-4.0 | 5.05 | 6.50 | 5.82 | 0.18 |
| **Ala(S1)-11 (NH) – Ala(S1)-11 (Hβ)** | **1.8-3.0** | **2.25** | **2.92** | **2.64** | **0.11** |
| **Ala(S1)-11 (NH) – Aminoethane-1,2-dithiol(S1, S2) (Hα)** | **1.8-4.0** | **1.96** | **2.54** | **2.26** | **0.10** |
| **Abu(S2)-22 (Hα) – Abu(S2)-22 (Hβ)** | **1.8-3.0** | **2.16** | **2.92** | **2.56** | **0.12** |
| Leu-14 (Hγ) – Aminoethane-1,2-dithiol(S1, S2) (Hα) | 1.8-5.0 | 7.48 | 12.74 | 10.80 | 0.77 |
| Asp-24 (Hβ) – Ala-21 (Me) | 1.8-4.0 | 5.97 | 8.00 | 6.84 | 0.32 |
| **Dhb-20 (NH) – Dhb-20 (Me)** | **1.8-5.0** | **3.62** | **4.28** | **4.06** | **0.07** |
| **Leu-14 (NH) – Leu-14 (Hγ)** | **1.8-3.0** | **1.82** | **4.58** | **2.91** | **0.54** |
| **Leu-14 (NH) – Leu-14 (Hα)** | **1.8-3.0** | **2.53** | **3.06** | **2.86** | **0.07** |
| **Ile-10 (NH) – Ile-10 (Hγ)** | **1.8-5.0** | **2.41** | **3.71** | **3.23** | **0.17** |
| Aaa-7 (CH) – Abu(S2)-22 (Me) | 1.8-5.0 | 14.75 | 18.31 | 17.04 | 0.57 |

*S* (AD)-*S* (BM)-*S* (AB): GFN2-xTB molecular dynamics distance monitors.

| nOe | Strength | Min. | Max. | Mean | S.D. |
| --- | --- | --- | --- | --- | --- |
| **Ile-1 (NMe) – Dhb-2 (NH)** | **1.8-5.0** | **3.31** | **4.86** | **4.27** | **0.17** |
| **Ile-1 (Hα) – Dhb-2 (NH)** | **1.8-3.0** | **1.76** | **3.19** | **2.35** | **0.19** |
| **Ile-1 (Hβ) – Dhb-2 (NH)** | **1.8-5.0** | **3.42** | **4.89** | **4.01** | **0.20** |
| **Dhb-4 (Hβ) – Val-5 (NH)** | **1.8-3.0** | **1.67** | **3.14** | **2.28** | **0.21** |
| **Dhb-6 (NH) – Dhb-6 (Me)** | **1.8-3.0** | **1.97** | **3.56** | **2.72** | **0.28** |
| **Dha-8 (NH) – Dha-8 (Hβ)** | **1.8-3.0** | **1.89** | **3.05** | **2.36** | **0.17** |
| Glu-9 (NH) – Dha-8 (Hβ) | 1.8-4.0 | 3.39 | 4.75 | 4.23 | 0.20 |
| **Ile-10 (NH) – Glu-9 (Hα)** | **1.8-3.0** | **1.69** | **2.70** | **2.16** | **0.15** |
| Ile-10 (NH) – Val-12 (Hα) | 1.8-3.0 | 4.20 | 6.37 | 5.00 | 0.32 |
| Glu-9 (Hα) – Val-12 (Hα) | 1.8-3.0 | 4.01 | 7.03 | 5.21 | 0.46 |
| **Ala(S1)-11 (Hα) – Glu-9 (Hα)** | **1.8-4.0** | **2.43** | **4.35** | **3.41** | **0.30** |
| **Val-12 (Hα) – D-Ala-13 (NH)** | **1.8-3.0** | **1.77** | **2.72** | **2.20** | **0.14** |
| **D-Ala-13 (Hα) – Leu-14 (NH)** | **1.8-5.0** | **2.02** | **3.59** | **2.61** | **0.22** |
| **Dhb-20 (NH) – Val-19 (Hβ)** | **1.8-3.0** | **1.68** | **4.45** | **2.65** | **0.36** |
| **Dhb-20 (NH) – Val-19 (Hα)** | **1.8-5.0** | **3.15** | **3.81** | **3.54** | **0.10** |
| **Abu(S2)-22 (NH) – Ala-21 (Hα)** | **1.8-5.0** | **2.38** | **3.85** | **3.39** | **0.22** |
| Abu(S2)-22 (NH) – Abu(S2)-22 (Hβ) | 1.8-3.0 | 3.16 | 3.88 | 3.56 | 0.11 |
| **Abu(S2)-22 (NH) – Abu(S2)-22 (Hα)** | **1.8-3.0** | **2.26** | **3.06** | **2.81** | **0.11** |
| **Trp-23 (NH) – Abu(S2)-22 (Hα)** | **1.8-4.0** | **2.27** | **3.71** | **3.18** | **0.18** |
| **Trp-23 (NH) – Trp-23 (Hα)** | **1.8-4.0** | **2.69** | **3.08** | **2.93** | **0.05** |
| **Trp-23 (NH) – Trp-23 (Hβ)** | **1.8-4.0** | **1.71** | **2.67** | **2.13** | **0.13** |
| **Ser-25 (NH) – Ser-25 (Hβ)** | **1.8-5.0** | **1.86** | **2.79** | **2.29** | **0.14** |
| **Aminoethane-1,2-dithiol(S1, S2) (NH) – Aminoethane-1,2-dithiol(S1, S2) (Hα)** | **1.8-3.0** | **2.70** | **3.09** | **2.94** | **0.05** |
| Aminoethane-1,2-dithiol(S1, S2) (NH) – Ala(S1)-11 (Hβ) | 1.8-3.0 | 2.26 | 3.97 | 3.28 | 0.24 |
| Ala(S1)-11 (NH) – Aminoethane-1,2-dithiol(S1, S2) (Hα) | 1.8-4.0 | 5.02 | 6.39 | 5.74 | 0.21 |
| **Ala(S1)-11 (NH) – Ala(S1)-11 (Hβ)** | **1.8-3.0** | **2.21** | **3.00** | **2.64** | **0.11** |
| **Ala(S1)-11 (NH) – Aminoethane-1,2-dithiol(S1, S2) (Hα)** | **1.8-4.0** | **1.93** | **2.62** | **2.29** | **0.10** |
| **Abu(S2)-22 (Hα) – Abu(S2)-22 (Hβ)** | 1.8-3.0 | **2.23** | **2.90** | **2.58** | **0.12** |
| Leu-14 (Hγ) – Aminoethane-1,2-dithiol(S1, S2) (Hα) | 1.8-5.0 | 9.32 | 12.63 | 11.12 | 0.58 |
| Asp-24 (Hβ) – Ala-21 (Me) | 1.8-4.0 | 5.47 | 7.46 | 6.60 | 0.29 |
| **Dhb-20 (NH) – Dhb-20 (Me)** | **1.8-5.0** | **3.72** | **4.28** | **4.05** | **0.07** |
| **Leu-14 (NH) – Leu-14 (Hγ)** | **1.8-3.0** | **1.98** | **4.49** | **3.24** | **0.59** |
| **Leu-14 (NH) – Leu-14 (Hα)** | **1.8-3.0** | **2.54** | **3.07** | **2.83** | **0.08** |
| **Ile-10 (NH) – Ile-10 (Hγ)** | **1.8-5.0** | **2.53** | **3.72** | **3.24** | **0.16** |
| Aaa-7 (CH) – Abu(S2)-22 (Me) | 1.8-5.0 | 14.04 | 18.07 | 16.37 | 0.72 |

Table S5. Bioassay Activity evaluation of kintamdin **1**.

| Strains/Cell lines | MIC/IC50(μM) | Gentamicin  (Control) | Staurosporine  (Control) |
| --- | --- | --- | --- |
| *Enterococcus faecium K60-39 b* | 19.8 | >134 | - |
| *Enterococcus faecium K59-68 b* | >20 | >134 | - |
| *Staphylococcus Haemolyticus b* | >20 | 40.2 | - |
| *E. faecalis a* | 14.8 | 1.0 | - |
| MRSAATCC 33591 *a* | >20 | 2.0 | - |
| *S. aureus* ATCC 25923 a | >20 | 0.3 | - |
| *Streptococcus b.* ATCC 12386 a | >20 | 1.0 | - |
| *E. coli* ATCC 25922 a | >20 | 0.3 | - |
| *P. aeruginosa* ATCC 27853 a | >20 | 1.0 | - |
| Skin cancer cell ATCC CRL-11147 | 2.4 | - | 9.0 |
| Breast cancer cell ATCC HTB-22 | 0.6 | - | 0.3 |
| Colon cancer cell ATCC HTB-38 | 12.0 | - | 5.4 |
| Lung normal cell ATCC CCL-171 | >20 | - | >100 |
| a standard strain; b clinic isolate | | | |

Table S6. Deduced Functions of *orfs* in the Kintaridin Biosynthetic Gene Cluster.

| **Gene** | **Sizea** | **Protein Homologb and Origin** | **Identities/ Positives, %** | **Proposed function** |
| --- | --- | --- | --- | --- |
| *orf(-2)*c | 308 | YaeI (WP_123975326) from *Streptomyces sp*. Ag109_O5-1 | 95/97 | Metallophosphoesterase |
| *orf(-1)*c | 226 | WP_133023397 from *Streptomyces sp*. BK329 | 92/93 | Integral membrane regulator |
| *kinA* | 57 | WP_071383936 from *Streptomyces sp*. MUSC 1 | 50/66 | Precursor peptide |
| *kinB* | 114 | WP_108060352 from *Spartobacteria bacterium* LR76 | 34/50 | Hypothetic protein/DUF1153 domain containing protein |
| *kinC* | 324 | WP_015659226 from *Streptomyces davaonensis* | 56/69 | Hypothetic protein |
| *kinD* | 385 | WP_079173441.1 from *Streptomyces sp.* MUSC 1 | 53/65 | Aminoglycoside phosphotransferase |
| *kinE* | 432 | PqqL (WP_060892880.1) from *Streptomyces europaeiscabiei* | 59/72 | Insulinase family protein/ peptidase M16_C |
| *kinF* | 458 | PqqL (WP_060892881.1) from *Streptomyces europaeiscabiei* | 44/63 | Insulinase family protein/ peptidase M16_C |
| *kinG* | 142 | WP_153461218.1 from *Streptomyces kaniharaensis* | 53/66 | Transposase |
| *kinH* | 311 | WP_015659222.1 from *Streptomyces davaonensis* | 43/53 | Hypothetic protein |
| *kinI* | 207 | WP_060891085.1 from *Streptomyces europaeiscabiei* | 66/78 | Flavoprotein/phosphopantothenoylcysteine decarboxylase |
| *kinJ* | 325 | WP_060891084.1 from *Streptomyces europaeiscabiei* | 69/82 | LLM class Flavin dependent oxidoreductase |
| *kinK* | 280 | YadH (WP_060891083) from *Streptomyces europaeiscabiei* | 57/75 | ABC transporter permease |
| *kinL* | 272 | CcmA (WP_106435783.1) from *Streptomyces davaonensis* | 73/81 | ABC transporter ATP binding protein |
| *kinM* | 550 | EFL25110.1 from *Streptomyces himastatinicus* ATCC 53653 | 46/60 | ABC transporter, ATP binding protein |
| *kinN* | 226 | CcmA (WP_063729889) from *Streptomyces sp*. RTd22 | 67/78 | ABC transporter ATP binding protein |
| *kinO* | 253 | PrmA (WP_007264900.1) from *Streptomyces sp*. C | 69/82 | Class I SAM dependent methyltransferase |
| *orf1c* | 511 | WP_141594955.1 from *Streptomyces ipomoeae* | 95/97 | LacI family DNA binding transcriptional regulator |
| *orf2c* | 124 | WP_079158480.1 from *Streptomyces* | 97/99 | Helix-turn-helix domain-containing protein |
| *orf3c* | 186 | WP_141594956.1 from *Streptomyces ipomoeae* | 95/97 | Helix-turn-helix transcriptional regulator |

a Numbers are in amino acids.
b NCBI accession numbers are given in parentheses.
c *orfs* beyond the *kin* gene cluster.

Table S7. Plasmids used in this study.

| **Plasmid** | **Description** | **Ref. or Source** |
| --- | --- | --- |
| pET-28a(+) | *pBR322 ori KanR T7lac f1 N-His6 C-His6*, for recombinant  protein expression in *E. coli* | Novagen |
| pCAP03-*acc(3)IV* | *pUC ori ARSH4/CEN6 Kan/NeoR TRP1 φC31int-attP oriT*  *(RP4) pAHD-URA3*, for TAR cloning | 4 |
| pCAP03-*kin*LR | pCAP03-*acc(3)IV*-derived plasmid, for capturing the kintaridin gene cluster | This work |
| pCAP03-*kin* | pCAP03 containing the kintaridin gene cluster, kanr | This work |
| pCAP03-*kin*2 | pCAP03-*kin* equipped with apramycin resistance gene | This work |
| pIJ773 | pBluescript KS (+), *aac(3)IV*, *oriT* (RK2), FRT sites | 3 |
| pIJ778 | pBluescript KS (+), *aadA*, *oriT* (RK2), FRT sites | 3 |
| pIJ790 | λ-RED (*gam*, *bet*, *exo*), *cat*, *araC*, *rep101*ts | 3 |
| pUZ8002 | *tra*, *neo*, RP4 derivative | 5 |
| pET-28a-*kinO* | For overexpression of *kinO* in *E. coli* | This work |
| pET-28a-*kinI* | For overexpression of *kinI* in *E. coli* | This work |

Table S8. Strains used in this study.

| **Strain** | **Relevant genotype and descriptions** | **Ref. or Source** |
| --- | --- | --- |
| ***Saccharomyces*** |  |  |
| *S. cerevisiae* VL6-48N | *MATα trp1-Δ1 ura3-Δ1 ade2-101 his3-Δ200 lys2 met14 cir°*, host for TAR cloning | 4 |
| ***Escherichia coli*** |  |  |
| DH10B | *F– mcrA Δ(mrr-hsdRMS-mcrBC) φ80lacZΔM15 ΔlacX74 recA1 endA1 araD139 Δ (ara-leu)7697 galU galK λ*– *rpsL(StrR) nupG*, strain used for general cloning and plasmid maintenance | Thermo Scientific |
| BL21 (DE3) | *fhuA2 [lon] ompT gal (λ DE3) [dcm] ∆hsdS*, widely used T7 expression *E. coli* strain | New England Biolabs |
| HST08 | *F–, endA1, supE44, thi-1, recA1, relA1, gyrA96, phoA, Φ80d lacZΔ M15, Δ (lacZYA - argF) U169, Δ (mrr - hsdRMS - mcrBC), ΔmcrA, λ–*, for general cloning and plasmid maintenance | Takara, Stellar™ Competent Cells |
| ET12567 | *dam*, *dcm*, *hsdM*, *hsdS*, *hsdR*, *cat*, *tet*,methylation-deficient *E. coli* used for conjugal DNA transfer | 6 |
| BW25113 | K-12 derivative: Δ*araBAD*, Δ*rhaBAD* | 7 |
| ***Streptomyces sp.* RK44** |  |  |
| WT | Wild type, kintaridin producing strain | Ghana isolate |
| ***Streptomyces coelicolor* M1152** |  |  |
| WT | M145Δ*act* Δ*red* Δ*cpk* Δ*cda* *rpoB*[C1298T], host for heterologous expression | 8 |
| RK8-46 | heterologous expression strain containing pCAP03-*kin*2 | This work |
| Δ*kinC* | In frame deletion mutant | This work |
| Δ*kinD* | In frame deletion mutant | This work |
| Δ*kinE* | In frame deletion mutant | This work |
| Δ*kinF* | In frame deletion mutant | This work |
| Δ*kinH* | In frame deletion mutant | This work |
| Δ*kinI* | In frame deletion mutant | This work |
| Δ*kinJ* | In frame deletion mutant | This work |
| Δ*kinO* | In frame deletion mutant | This work |
| Δ*orf(-2)* | In frame deletion mutant | This work |
| Δ*orf(-1)* | In frame deletion mutant | This work |
| Δ*orf1* | In frame deletion mutant | This work |

Table S9. Primers used in this study.

| **Primer** | **Sequence** | **Use** |
| --- | --- | --- |
| RKtar_Lfor | TCTACAAAGATCGACTAGTCCGACCGCCCGACCTTTTTA | Construction of pCAP03-*kin*LR |
| RKtar_Lrev | TAGTTGTTGTAGGACTAGTGGTGTACGCCGGGTGGGTTA |
| RKtar2_Rfor | GGCCAGCAAAACTAAGGTACCTTCCTCGTCCTCGTGTTAC |
| RKtar2_Rrev | ATTTTTCTAAATACAGGTACCCTTTTTGCATGCGGTGTTA |
| Metrans_L_Hdfor | AAAAAGCTTCGAAGGCGAGGGCGGCGATGGACAGA | TAR colony screening |
| Metrans_L_Xbrev | AAATCTAGATGAACACGAGGAAATGAGAGCCCTGCTGGAA |
| PM16MP_L_Hdfor | GGTAAGCTTAGACATGCACGCCGCCAGCCAAACATA |
| PM16MP_L_Xbrev | CCATCTAGACATTCGTCAGCCCCCACTGTCCCTGGTA |
| Prep_L_Hdfor | GCCAAAGCTTAACCCACCCGGCGTACACCAAAAT |
| PreP_L_Xbrev | CGTTCTAGACACAGCGACCCCTCAACTTTCCAT |
| Metrans_PTfor | aaaatgatcgctgcttgccctgcgggagtgaaccctatgATGCATATTCCGGGGATCCGTCGACC | Construction of ∆*kinO* |
| Metrans_PTrev | tcctgcaattccagcagggctctcatttcctcgtgttcaATGCATTGTAGGCTGGAGCTGCTTC |
| PM16MP_PTfor | cgtccaattggtaccagggacagtgggggctgacgaatgATGCATATTCCGGGGATCCGTCGACC | Construction of ∆*kinF* |
| PM16MP_PTrev | ccttcgtgcatcccatcgcgcgtgatagtcgtgtcgctaATGCATTGTAGGCTGGAGCTGCTTC |
| PPDC_PTfor | atctcgaagagatcttcgccgcgttggatcggcttcatgATGCATATTCCGGGGATCCGTCGACC | Construction of ∆*kinI* |
| PPDC_PTrev | tcaacgagctgtcgcatcctggaatcaccgctcctcaggATGCATTGTAGGCTGGAGCTGCTTC |
| RKMPH_PTfor | gtctgacacgatggtcgtatgcgcgctcgatacggagtaATGCATATTCCGGGGATCCGTCGACC | Construction of ∆*orf(-2)* |
| RKMPH_PTrev | gcatatctggcattttggtgtacgccgggtgggttactcATGCATTGTAGGCTGGAGCTGCTTC |
| RKIMR_PTfor | ggcacacccgtactgtggcccgggcacgttcccgtgacgATGCATATTCCGGGGATCCGTCGACC | Construction of ∆*orf(-1)* |
| RKIMR_PTrev | actttagcccactggtggccggagacgaaatccggtttaATGCATTGTAGGCTGGAGCTGCTTC |
| RKLacI_PTfor | gccgcgtaacacgaggacgaggaaggggaggagtacttgATGCATATTCCGGGGATCCGTCGACC | Construction of ∆*orf1* |
| RKLacI_PTrev | cagttatcgccaggggcacagcagcattcaccgttggtgATGCATTGTAGGCTGGAGCTGCTTC |
| RkpD_PTfor | tgtacacgtatcgacgctgggcttggagaagacgcgatgATGCATATTCCGGGGATCCGTCGACC | Construction of ∆*kinC* |
| RkpD_PTrev | agcggtctctcctcggtccggcaccggtcacgccaatccATGCATTGTAGGCTGGAGCTGCTTC |
| RkpE_PTfor2 | ctacggtcgccagacatgattgatagccaggaggtgctgATGCATATTCCGGGGATCCGTCGACC | Construction of ∆*kinD* |
| RkpE_PTrev2 | cagcgtcgatacgtgtacatacgggtcgagtagcaggacATGCATTGTAGGCTGGAGCTGCTTC |
| RkpI_PTfor | aatccggacctgaggagcggtgattccaggatgcgacagATGCATATTCCGGGGATCCGTCGACC | Construction of ∆*kinH* |
| RkpI_PTrev | cctgccggggccgaccaccggacatcacagcttctacagATGCATTGTAGGCTGGAGCTGCTTC |
| RkpK_PTfor | tgaccgacagaggacacgatgacgtcaatggaacacagcATGCATATTCCGGGGATCCGTCGACC | Construction of ∆*kinJ* |
| RkpK_PTrev | tcagccatgaagccgatccaacgcggcgaagatctcttcATGCATTGTAGGCTGGAGCTGCTTC |
| PM16C_PTfor | gcgttttgaaacttacccaactcctctagggtgagccacATGCATATTCCGGGGATCCGTCGACC | Construction of ∆*kinE* |
| PM16C_PTrev | aacctggtccggagcgtgccgggttccactcgttcattcATGCATTGTAGGCTGGAGCTGCTTC |
| dMetra_ScrFor | CGCCGCCAGATGGAGAAGGGTTGATTT | Verification of ∆*kinO* |
| dMetra_ScrRev | GCGAATGCCCGGGTCAGATTTCAG |
| dPM16M_ScrFor | GCCATTGCCGCACGGGGACTGAG | Verification of ∆*kinF* |
| dPM16M_ScrRev | GCAGGAGGGCGCGGCATGTTTTCAGT |
| dPPDC_ScrFor | GCTGGTAGCCGGTCCCGAACTCCTCAA | Verification of ∆*kinI* |
| dPPDC_ScrRev | CAATCCGGCGGGAGTGATCCAGAGTGAG |
| dLacI_ScrFor | CCGACACCCAACTTATGCGTAA | Verification of ∆*orf1* |
| dLacI_ScrRev | CGGCGACTCATCCCCTTCACA |
| dRkpD_ScrFor | GCATTCGGCAGCAGTCGCTTTTCCTG | Verification of ∆*kinC* |
| dRkpD_ScrRev | CATGCACGCTTTCTGGGAAGGCTATT |
| dRkpE_ScrFor | GACTCACCAGCCCGCTCGGATTCTCA | Verification of ∆*kinD* |
| dRkpE_ScrRev | TGTTTGGCTGGCGGCGTGCATGTCTACTG |
| dRkpK_ScrFor | AAGTGAAAGCTCGCGGGGTGTATCA | Verification of ∆*kinJ* |
| dRkpK_ScrRev | ACAGAGGACACGATGACGTCAATGGAA |
| dPM16C_ScrFor | TTCATGCAGCACCTCCTGGCTATCAATCA | Verification of ∆*kinE* |
| dPM16C_ScrRev | AGCGTGCCGGGTTCCACTCGTTCATT |
| Prep_L_Hdfor | GCCAAAGCTTAACCCACCCGGCGTACACCAAAAT | Verification of ∆*orf(-1)* |
| PreP_L_Xbrev | CGTTCTAGACACAGCGACCCCTCAACTTTCCAT |
| PM16MP_R_Xbfor | AAATCTAGATAGCGACACGACTATCACGCGCGATGGGAT | Verification of ∆*kinH* |
| PM16MP_R_EIrev | AAAGAATTCTGATTCCAGGATGCGACAGCTCGTTGAGG |
| Metra_for2 | GTCGCGGATCCGAATTCATGGACTCGACGCAAACCTATGA | Overexpression of *kinO* |
| Metra_rev | AGTGCGGCCGCAAGCTTTTCCAGCAGGGCTCTCATTTC |
| PPDC_for | GTCGCGGATCCGAATTCATGGCTGAGCCGCCCGTCAGTG | Overexpression of *kinI* |
| PPDC_rev | AGTGCGGCCGCAAGCTTGAGCTGTCGCATCCTGGAATCAC |
| CAPapr-for2 | atcgggccctggccaGCTAGCTGGATACACCAAGGAAAGT | Construction of pCAP03-*kin*2 |
| CAPapr-revNheI | tgcaggtcgactctaGCTAGCTTATGAGCTCAGCCAATCG |

Restriction sites are underlined.

Table S10. KinA homologs identified by BlastP.

| **No.** | **Sequence ID** | **Sizea** | **Organism** | **Identities/ Positives, %** |
| --- | --- | --- | --- | --- |
| 1 | WP_071383936.1 | 62 | *Streptomyces sp*. MUSC 1 | 50/66 |
| 2 | WP_093682639.1 | 62 | MULTISPECIES: *Streptomyces* | 50/66 |
| 3 | WP_015659228.1 | 61 | *Streptomyces davaonensis* | 54/62 |
| 4 | WP_060892876.1 | 62 | *Streptomyces europaeiscabiei* | 56/64 |
| 5 | WP_122818067.1 | 59 | MULTISPECIES: *Nocardioides* | 57/66 |
| 6 | SIR64717.1 | 55 | *Microbispora rosea* | 53/68 |
| 7 | ATZ25984.1 | 49 | *Streptomyces lavendulae subsp. lavendulae* | 62/76 |
| 8 | WP_060892875.1 | 66 | *Streptomyces europaeiscabiei* | 50/60 |
| 9 | WP_015659229.1 | 66 | *Streptomyces davaonensis* | 47/59 |
| 10 | SDP74697.1 | 55 | *Actinopolyspora xinjiangensis* | 56/59 |
| 11 | PRY11524.1 | 55 | *Kineococcus rhizosphaerae* | 50/61 |
| 12 | SDP74697.1 | 55 | *Actinopolyspora xinjiangensis* | 51/62 |
| 13 | WP_093682638.1 | 60 | MULTISPECIES: *Streptomyces* | 50/61 |
| 14 | WP_071383935.1 | 60 | *Streptomyces sp*. MUSC 1 | 74/85 |
| 15 | SDP74684.1 | 55 | *Actinopolyspora xinjiangensis* | 53/62 |
| 16 | SOE29366.1 | 79 | *Streptomyces sp*. OK228 | 59/70 |
| 17 | WP_053560634.1 | 65 | MULTISPECIES: *Streptomyces* | 42/56 |
| 18 | SDS42376.1 | 59 | *Corynebacterium timonense* | 44/61 |
| 19 | WP_054237385.1 | 66 | *Streptomyces sp*. OK228 | 42/57 |
| 20 | WP_079089964.1 | 66 | *Streptomyces sp*. OK228 | 57/70 |
| 21 | KPH96831.1 | 79 | *Actinobacteria* bacterium OK006 | 57/70 |
| 22 | WP_082417909.1 | 66 | *Actinobacteria* bacterium OK006 | 54/70 |
| 23 | WP_078077249.1 | 60 | *Streptomyces niveus* | 44/60 |
| 24 | WP_076436126.1 | 60 | *Microbispora rosea* | 44/57 |
| 25 | WP_037654341.1 | 60 | *Streptomyces achromogenes* | 39/57 |
| 26 | WP_142258544.1 | 64 | *Thermopolyspora flexuosa* | 44/57 |
| 27 | PZN41714.1 | 64 | *Actinobacteria bacterium* | 44/56 |
| 28 | PRY11523.1 | 54 | *Kineococcus rhizosphaerae* | 46/58 |
| 29 | WP_067439886.1 | 61 | *Streptomyces lincolnensis* | 43/60 |
| 30 | WP_076436129.1 | 63 | *Microbispora rosea* | 48/60 |
| 31 | WP_030330388.1 | 62 | MULTISPECIES: *Micromonospora* | 42/56 |
| 32 | WP_073921129.1 | 61 | *Streptomyces sp*. CB00455 | 42/58 |
| 33 | WP_089210132.1 | 69 | *Streptosporangium subroseum* | 40/58 |
| 34 | WP_058047571.1 | 71 | *Streptomyces sp*. MBT76 | 36/50 |
| 35 | WP_093908739.1 | 72 | unclassified Streptomyces | 35/50 |
| 36 | WP_107466734.1 | 72 | *Streptomyces sp*. MA5143a | 57/70 |
| 37 | WP_141310909.1 | 72 | *Streptomyces spinoverrucosus* | 57/70 |
| 38 | WP_055513948.1 | 72 | MULTISPECIES: *Streptomyces* | 57/70 |
| 39 | WP_120754724.1 | 71 | *Streptomyces klenkii* | 35/50 |
| 40 | WP_019324892.1 | 72 | MULTISPECIES: *Streptomyces* | 57/70 |
| 41 | WP_031172570.1 | 72 | *Streptomyces durhamensis* | 57/70 |
| 42 | WP_017198208.1 | 71 | *Arthrobacter sp.* M2012083 | 37/50 |
| 43 | WP_018960897.1 | 71 | unclassified *Streptomyces* | 53/70 |
| 44 | WP_030366991.1 | 71 | MULTISPECIES: *Actinobacteria* | 35/49 |
| 45 | WP_128433858.1 | 62 | *Streptomyces cyaneus* | 34/50 |
| 46 | WP_053560637.1 | 65 | MULTISPECIES: *unclassified Streptomyces* | 40/56 |
| 47 | AGP61349.1 | 51 | *Streptomyces rapamycinicus* NRRL 5491 | 46/69 |
| 48 | WP_055704500.1 | 60 | *Streptomyces puniciscabiei* | 41/54 |
| 49 | WP_106115029.1 | 60 | *Actinopolyspora mortivallis* | 35/59 |
| 50 | WP_009079844.1 | 75 | MULTISPECIES: *Actinobacteria* | 49/55 |

a Numbers are in amino acids.
