# Supplementary material for: A ribosomally synthesized and post-translationally modified peptide containing a β-amino acid and a macrocyclic motif
Source: Research Square preprint supplement (doi:10.21203/rs.3.rs-352308/v1), 2021-04-14
Supplement: Supplementary file 3 [file c595a80279d789d75bb817e3.docx]

Supporting information – General methods

[**General methods and Experimental procedures** 2](#_Toc67124461)

[1. Molecular network methods 2](#_Toc67124462)

[2. Isolation and structure determination of **1** 2](#_Toc67124463)

[3. FT-ICR Mass Spectrometry. 2](#_Toc67124464)

[4. Antiproliferative/Cytotoxicity Assays 3](#_Toc67124465)

[5. Antibacterial Assay 3](#_Toc67124466)

[6. Simulation results 3](#_Toc67124467)

[7. Heterologous expression of the *kin* BGC 4](#_Toc67124468)

[8. PCR targeting of the *orf*s in the *kin* BGC 4](#_Toc67124469)

[9. Purification of the recombinant KinI and KinO in *E. coli* 5](#_Toc67124470)

[10. Biochemical assay for methyltransferase KinO 5](#_Toc67124471)

**General methods and Experimental procedures**

1. Molecular network methods

HRMS raw data were processed with ProteoWizard MSconvert software and MZmine 2.38. MS/MS metabolite identifications were made by comparing experimental MS/MS spectra with library spectra from GNPS1 (Global Natural Products Social Molecular Networking)1 library. For the metabolites that were selected for more in-depth characterization, classification of structure or substructure was performed by searching databases such as Antibase 2012, NP Atlas, Dictionary of Natural Products and GNPS. Predicted structures resulting from a matched intact mass (Δ4 ppm error) were subsequently validated through manual analysis of fragmentation mass spectra.

1. Isolation and structure determination of **1**

*Streptomyces* sp. RK44was cultivated in ISP2 medium (10 L) at 28 °C for 7 days. Subsequently, Diaion® HP-20 (3.0 g/50 mL) was added to the culture broth and incubated overnight under the same culture conditions. The mixture was filtered under vacuum, after which the residue consisting of the mycelium and HP-20 resin was submerged in 100% methanol (3 x 500mL) for 24h. The methanol extract was concentrated under reduced pressure to give a crude extract (10.0 g) which was then fractionated by solid phase extraction (SPE) using Strata® C18-E resulting six fractions (S1–S6) and analysed by HRMS. Fraction S2 contained **6** was further purified using High Pressure Liquid Chromatography (HPLC, Agilent Technologies 1260 Infinity, Waldbronn, Germany) over an ACE reversed-phase column( C-18 ,10 μM 10 × 250 mm), and eluting with the following gradient method: (mobile phase A: water +0.1% formic acid; mobile phase B: Methanol) 0–20 min 50% B; 20–20.1 min 50–100% B; 20.1–28 min 100% B; 28–28.1 min 100–40% B; and 28.1–33 min 40% B; flow rate 1.5 mL min−1; injection volume 0.02 mL. Absorbance was monitored at 220 nm. The pure compound was subjected to analysis by HRMS and 1D and 2D NMR as described in the main text.

For advanced Marfey’s analysis, the purified **1** (0.5 mg) was hydrolyzed in 1 mL HCl (6 M) at 115 °C for 17 h. The hydrolysate was evaporated to dryness under a stream of dry N2 and the residue was dissolved in 100 μL of water and treated with 20 μL NaHCO3(1 M) and 100 μL 1-fluoro-2, 4-dinitrophenyl-5-L-leucinamide (L-FDLA) (1 M) at 40 °C for 1 h. The reaction was quenched with 20 μL of HCl (2 M) and diluted with 200 μL of MeOH. The standard amino acids were derivatized with L-FDLA and analyzed by HPLC-DAD in the same manner as **1**. The stereochemistry was determined by comparing the retention time of the L-FDLA derivatized samples using LC-HRMS analysis.

1. FT-ICR Mass Spectrometry.

Peptide samples were ionised by electrospray (nESI) at a typical concentration of 5 µM. MS analyses were performed on a SolariX FT-ICR instrument equipped with an Infinity ICR cell and a 12T magnet (Bruker Daltonics, Bremen, Germany). For intact mass analysis, spectra were acquired between m/z 500 and 5000, to yield a broadband 1 or 2 MW time-domain transient. Ion accumulation was set to between 50-200 ms, and typically each spectrum was the sum of 50 acquisitions.

Peptide charge state were selected for MS/MS and isolated using CASI (continuous accumulation of selected ions) with a quadrupole width of 2-5 m/z. Fragmentation was performed using both collision induced dissociation (CID) in the collision cell and electron capture dissociation (ECD) using a heated hollow dispenser cathode in the ICR cell. For ECD, typical cathode conditions were bias voltage 1.5 V, lens voltage 15 V, and a pulse length of between 10-30 ms. MS2 spectra were recorded between m/z 300 to 5000 and were the sum of 100 1 MW time-domain transients. Pseudo MS3 experiments were performed by first inducing in-source fragmentation by increasing the voltage applied to Funnel 1. A specific fragment ion was isolated using CASI and subject to further fragmentation using either CID or ECD as described above. Data analysis was performed using DataAnalysis (Bruker Daltonics) and, if required, monoisotopic masses were determined using the sophisticated numerical annotation procedure (SNAP; Bruker Daltonics).

1. Antiproliferative/Cytotoxicity Assays

The antiproliferative activity of **1** was tested against a panel of cancer cell lines. (Table 1). Cell lines (2000 cells/well) were added, respectively, to 96‐well plates (Nunc, Thermo Fisher Scientific, US) in Dulbecco’s Modified Eagle Medium (DMEM) containing 10% foetal bovine serum (FBS) and gentamicin (10 μg/mL). Cells were incubated for 24 h at 37 °C and maintained in a humidified atmosphere of 5% CO2 and low passage. The lung normal cell lines (ATCC CCL‐171) were used for toxicity testing of **1**. Cell lines (4000 cells/well) were added to 96‐well plates and incubated in similar conditions as described above. At the end of 24 h, the test compound (0.1, 1, 2.5, 5, 10, 12.5, 25, and 50 μM) was added to the wells and incubated for 72 h. Cell viability was determined by a colorimetric MTS assay using a tetrazolium dye, 3‐(4,5‐dimethylthiazol‐2‐yl)‐5‐(3‐carboxymethoxyphenyl)‐2‐(4‐sulfophenyl)‐2H‐ tetrazolium, inner salt, and an electron coupling reagent, phenazine methosulfate (PMS). Cell Titer 96®Aqueous One Solution Reagent (Promega, Madison, WI, USA) (10 μL) was added to each well and then incubated for 1 h at 37 °C. The absorbance was recorded on a plate reader at 490 nm. The number of living cells was determined by measuring their ability to reduce the tetrazolium salt to the coloured formazan product at 490 nm. Staurosporine (Sigma) was used as standard reference.

1. Antibacterial Assay

Nine bacterial strains were used in this study. The clinical isolate of VRE (*Enterococcus faecium* K60-39 *and* K59-68) were provided as courtesy of Professor Kristin Hegstad (University Hospital of North Norway). Minimal inhibitory concentration (MIC) assays were adapted according to the recommendations of the Clinical and Laboratory Standard Institute (CLSIM07). MICs were tested using 96-well microdilution plates in Mueller–Hinton broth (Becton Dickinson, UK) at 37 °C; dilutions of the compound were made in triplicate in 96-well culture dishes. Strains were taken from an exponentially growing culture and diluted to 5 × 105 CFU/mL. The bacteria were cultured in the presence of tested compounds for about 20 h and bacterial growth was monitored visually following the CLSI guidelines.

1. Simulation results

Table S4 shows a summary of the results of the distance monitors used in the kintamdin peptide molecular dynamics simulations used to check agreement with the interactions observed in the ROESY experiments. Looking at the total figures it is difficult to unequivocally decide between the candidate structures other than to exclude the 11*R*, 22α*R*, 22β*S*, 27*R* stereoisomer which satisfied approximately 10% less of the monitors than the other structures. An almost identical picture is obtained from inspection of the ‘short’ distance monitors (to be expected since these are by far the most numerous of the three types). Similarly, the medium-range interactions did not provide particularly useful information to aid in distinguishing between the structures, leading to the conclusion that both short- and medium-range interactions were best classed as ‘local’ correlations which would be expected to provide similar NMR signals regardless of the exact nature of the stereocentres under study.

Thus, it was concluded that the key information would be most likely to be whether or not an individual structure was capable of satisfying the longer-range distance monitors since these provide information on the global structure of the peptide and are therefore likely to be sensitive to changes in the structure such as the chirality inversions in the bridging *bis*-thioether moiety. Given that the most likely candidate based on the global percentage of satisfied monitors (11*S*, 22α*R*, 22β*S*, 27*R*) failed to satisfy either of the long-range distance monitors, this was removed from consideration. Of the remaining structures, three were seen to satisfy one long-range monitor but only the 11*R*, 22α*S*, 22β*S*, 27*S* stereoisomer was able to satisfy both and for this reason we concluded that this was the most likely structure based on the available data. It should be pointed out that in these cases the monitored distances showed very high standard deviations, as is to be expected from long-range flexible interactions such as these, and that distance satisfaction is based on the observation of minimum distances that agree with the NMR data under the assumption that simulation on the time-scale of the experiments (if this was possible) would yield sufficient numbers of such short distances to produce the observed experimental signal (Supplementary Information, Table S1, Figures S29-31 and S34-36).

1. Heterologous expression of the *kin* BGC

A plasmid pCAP03-*kin*LR was constructed to capture the kintamdin gene cluster from *Streptomyces sp*. RK44 genomic DNA. The 1034 bp 5’ and 1210 bp 3’ homology arms were inserted into the *Spe*I site and the *Kpn*I site of pCAP03-*acc(3)IV* using In-Fusion® HD Cloning Kit (Takara Bio, Inc), respectively. The resulting capture vector was linearized with *Xho*I and *Nde*I to release the targeting hooks and co-transformed with *Asc*I-digested genomic DNA into yeast spheroplasts. Preparation of yeast spheroplast cells and transformation, isolation of candidate colonies, colony PCR screening and DNA extraction from PCR positive yeast clones were conducted according to previously reported protocol2. Desired transformants were identified by PCR with three pairs of primers (Metrans_L_Hdfor/Xbrev, PM16MP_L_Hdfor/Xbrev and Prep_L_Hdfor/Xbrev) listed in Table S9.

The plasmids from three positive clones were recovered and transformed into *E*. *coli* DH10B for amplification and further restriction analysis of the purified construct (pCAP03-*kin*). Apramycin resistance gene amplified from pIJ773 was then inserted into the *Nhe*I site of verified pCAP03-*kin* to yield pCAP03-*kin*2. *E. coli* ET12567/pUZ8002 was transformed with pCAP03-*kin*2, and transformants were then used to transfer pCAP03-*kin*2 into *Streptomyces coelicolor* M1152 by intergeneric conjugation. Nalidixic acid (50 µg/mL) and apramycin-resistant (50 µg/mL) exconjugants containing integrated pCAP03-*kin*2 were verified by PCR with the three pairs of primers mentioned above.

1. PCR targeting of the *orf*s in the *kin* BGC

To perform the in-frame deletion of the *orfs* contained in pCAP03-*kin*2, the λ-RED mediated PCR-targeting technique was applied following reference3. PCR targeting primer couples (Table S9) were designed to amplify the *aadA* resistance cassette from *Eco*RI/*Hin*dIII digested pIJ778. The resulting cassettes were then transferred into *E. coli* BW25113/pIJ790/pCAP03-*kin*2 to delete *orf(-2)*, *orf(-1)*, *kinC* to *kinF*, *kinH* to *kinJ*, *kinO* and *orf1*, respectively. After transformation into *E. coli* DH10B for amplification and verification, the obtained pCAP03*-kin*2 derived plasmids were digested with *Nsi*Iand re-ligated to remove the *aadA* cassette. These constructs were then introduced into *S. coelicolor* M1152 by conjugation and selecting for apramycin resistance.

1. Purification of the recombinant KinI and KinO in *E. coli*

The genes *kinO* and *kinI* were amplified from the plasmid pCAP03-*kin* using KOD hot start DNA polymerase (Novagen) and the primers listed in Table S9. The resulting PCR products were inserted into pET-28a(+) using In-Fusion® HD Cloning Kit (Takara Bio, Inc) to yield pET-28a-*kinO* and pET-28a-*kinI*, respectively. For protein purification, the two constructs above were individually transformed into *E. coli* BL21(DE3). Single colonies from each transformation were grown overnight in 5 mL LB media containing kanamycin (50 µg/mL). The overnight culture was transferred to 200 mL fresh LB medium supplemented with kanamycin (50 µg/mL) and cultivated at 37 °C until the cell density reached an OD600 of 0.6. IPTG was added to a final concentration of 0.1 mM to induce protein expression. After induction, cells were grown for 16-20 h at 16 °C and then harvested by centrifugation at 4 °C. The cell pellets were resuspended in buffer A (50 mM Tris-HCl, 0.3 M NaCl, 10 mM imidazole, pH 8.0), followed by lysis with an ultrasonic processor. To remove cell debris, the lysate was centrifuged (4500 rpm, 4 °C for 15 min). The supernatant was filtered through a 0.45 µm filter prior to purification with HIS-Select® Nickel Affinity Gel (Millipore). The resin was washed with 10 mL of buffer A, followed by two times of washing with buffer B (50 mM Tris-HCl, 0.3 M NaCl, 20 mM imidazole, pH 8.0). The recombinant protein was eluted with 5 mL of buffer C containing 200 mM imidazole and concentrated to 1.0 mL using an Amicon Ultra-15 Centrifugal Filter Unit (Millipore). The protein solution was then desalted by PD-10 Columns (GE Healthcare) according to manufacturer’s instruction. The purified protein was store at -80 °C in storage buffer (100 mM Tris-HCl, pH 8.0, 150 mM NaCl, 10% (w/v) glycerol, 1 mM DTT).

1. Biochemical assay for methyltransferase KinO

N-His6–tagged methyltransferase KinO (∼10 μM) was incubated with nonmethylated kintaridin at 28 °C for 1.5 h in a 50 μL volume of reaction buffer (50 mM Tris HCl, 2 mM TCEP, 3 mM S-adenosyl methionine, 10 mM MgCl2, pH 8.0). The reaction mixture was quenched with two volumes of methanol and then subject to Q-TOF analysis.

**Reference**

1. Wang, M. *et al.* Sharing and community curation of mass spectrometry data with Global Natural Products Social Molecular Networking. *Nat. Biotechnol.* **34**, 828–837 (2016).

2. Zhang, J. J. *et al.* HHS Public Access. *Methods Enzym.* **621**, 87–110 (2019).

3. Gust, B. *et al.* λ Red-mediated genetic manipulation of antibiotic-producing Streptomyces. *Adv. Appl. Microbiol.* **54**, 107–128 (2004).

4. Tang, X. *et al.* Identification of Thiotetronic Acid Antibiotic Biosynthetic Pathways by Target-directed Genome Mining. *ACS Chem. Biol.* **10**, 2841–2849 (2015).

5. Kieser, T. *et al.* *Practical streptomyces genetics*. vol. 291 (John Innes Foundation Norwich, 2000).

6. MacNeil, D. J. *et al.* Analysis of Streptomyces avermitilis genes required for avermectin biosynthesis utilizing a novel integration vector. *Gene* **111**, 61–68 (1992).

7. Datsenko, K. A. & Wanner, B. L. One-step inactivation of chromosomal genes in Escherichia coli K-12 using PCR products. *Proc. Natl. Acad. Sci.* **97**, 6640–6645 (2000).

8. Gomez-Escribano, J. P. & Bibb, M. J. Engineering Streptomyces coelicolor for heterologous expression of secondary metabolite gene clusters. *Microb. Biotechnol.* **4**, 207–215 (2011).
