# Supplementary material for: A ribosomally synthesized and post-translationally modified peptide containing a β-amino acid and a macrocyclic motif
Source: Research Square preprint supplement (doi:10.21203/rs.3.rs-352308/v1), 2021-04-14
Supplement: Supplementary file 4 [file e7a32225e3ac4b98e75cd28a.docx]

Supporting information – Figures 21-46

[Figure S21. Expanded and annotated 1H NMR spectrum of **1**. 2](#_Toc67128139)

[Figure S22. Expanded and annotated 1H NMR spectrum of **1**. 3](#_Toc67128140)

[Figure S23. Expanded and annotated 1H NMR spectrum of **1**. 4](#_Toc67128141)

[Figure S24. Expanded and annotated 1H NMR spectrum of **1**. 5](#_Toc67128142)

[Figure S25. Expanded and annotated HSQC spectrum of **1**. 6](#_Toc67128143)

[Figure S26. Expanded and annotated HSQC spectrum of **1**. 7](#_Toc67128144)

[Figures S27. Annotated HSQC spectrum of **1**. 8](#_Toc67128145)

[Figure S29. Assignment of NHs in key amino acid residues using COSY correlations between α to NH of amino acid residue. 10](#_Toc67128146)

[Figure S30. Key correlations in the ROESY spectrum showing link between Ala(S1)-11 and aminoethane-1,2-dithiol group. 11](#_Toc67128147)

[Figure S31. The planar structure of **1** with COSY/HSQC-TOCSY, HMBC (H→C) observed correlations of **1**. 12](#_Toc67128148)

[Figure S34. Observed ROE correlation between Aaa-7-2 and the methyl group of Abu(S2)-22-4. 15](#_Toc67128149)

[Figure S35. Observed ROE correlation between Ala-21-2 and Asp-24-3A. 16](#_Toc67128150)

[Figure S36. Observed ROE correlation between Ala-21-2 and Leu-14-3A. 17](#_Toc67128151)

[Figure S38. MS analysis of **1** identified from heterologous expression system. 19](#_Toc67128152)

[Figure S39. Tandem MS analysis of **1** identified in the heterologous expression system. 20](#_Toc67128153)

[Figure S40. EIC extraction of 1 in the variants. 21](#_Toc67128154)

[Figure S41. Tandem MS analysis of the intermediate **2** accumulated in the *kinO* variant. 22](#_Toc67128155)

[Figure S42. Tandem MS analysis of the intermediate **3** accumulated in the *kinI* variant. 23](#_Toc67128156)

[Figure S44. EIC analysis of the product generated in the assay of incubation of KinO with **2** accumulated. 25](#_Toc67128157)

[Figure S45. Proposed biosynthetic pathway to form kintamdin. 26](#_Toc67128158)


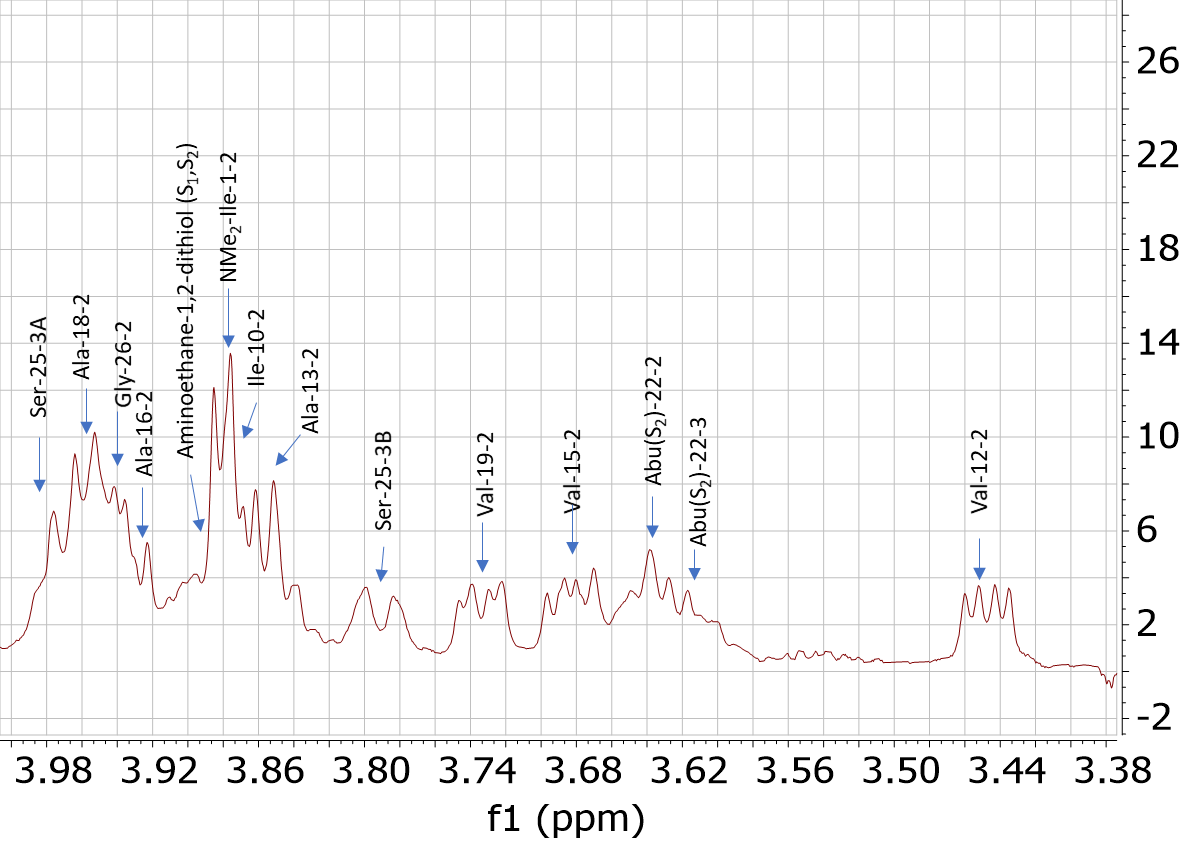


Figure S21. Expanded and annotated 1H NMR spectrum of **1**.


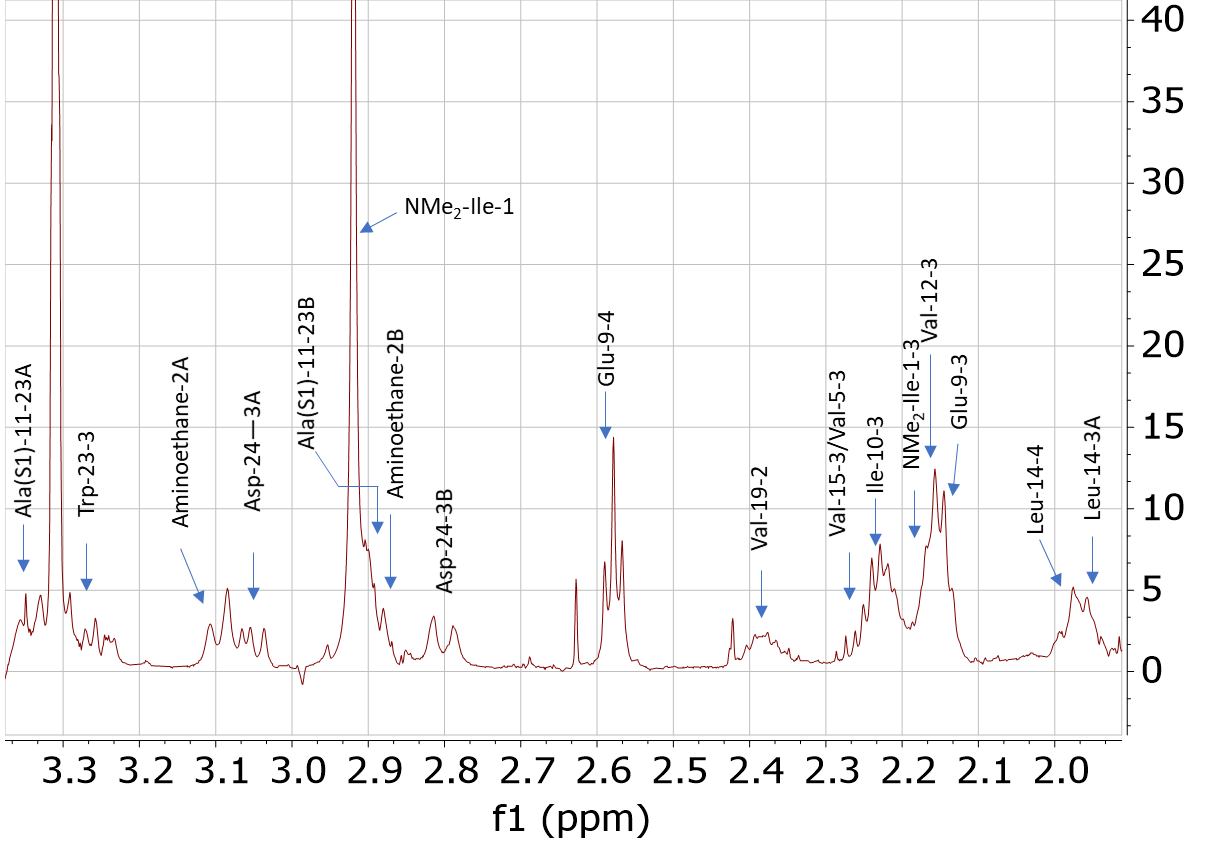


Figure S22. Expanded and annotated 1H NMR spectrum of **1**.


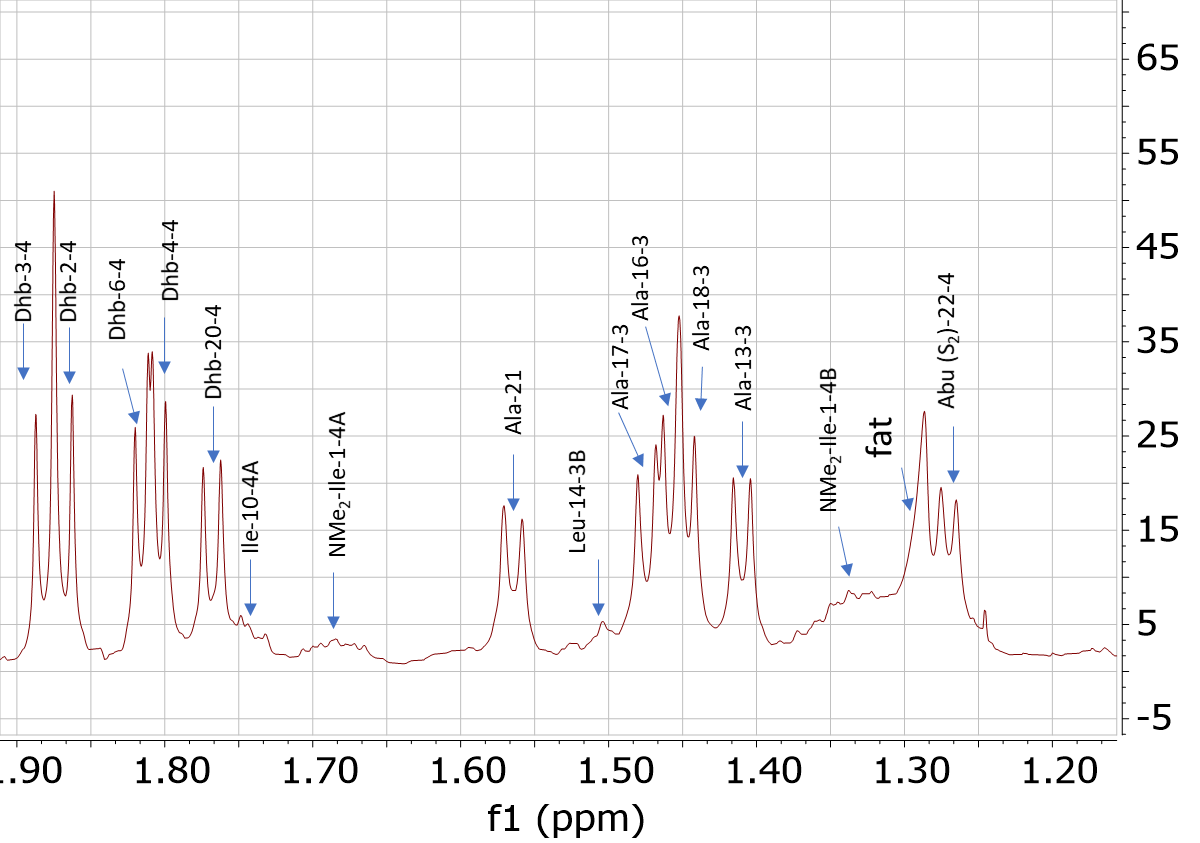


Figure S23. Expanded and annotated 1H NMR spectrum of **1**.


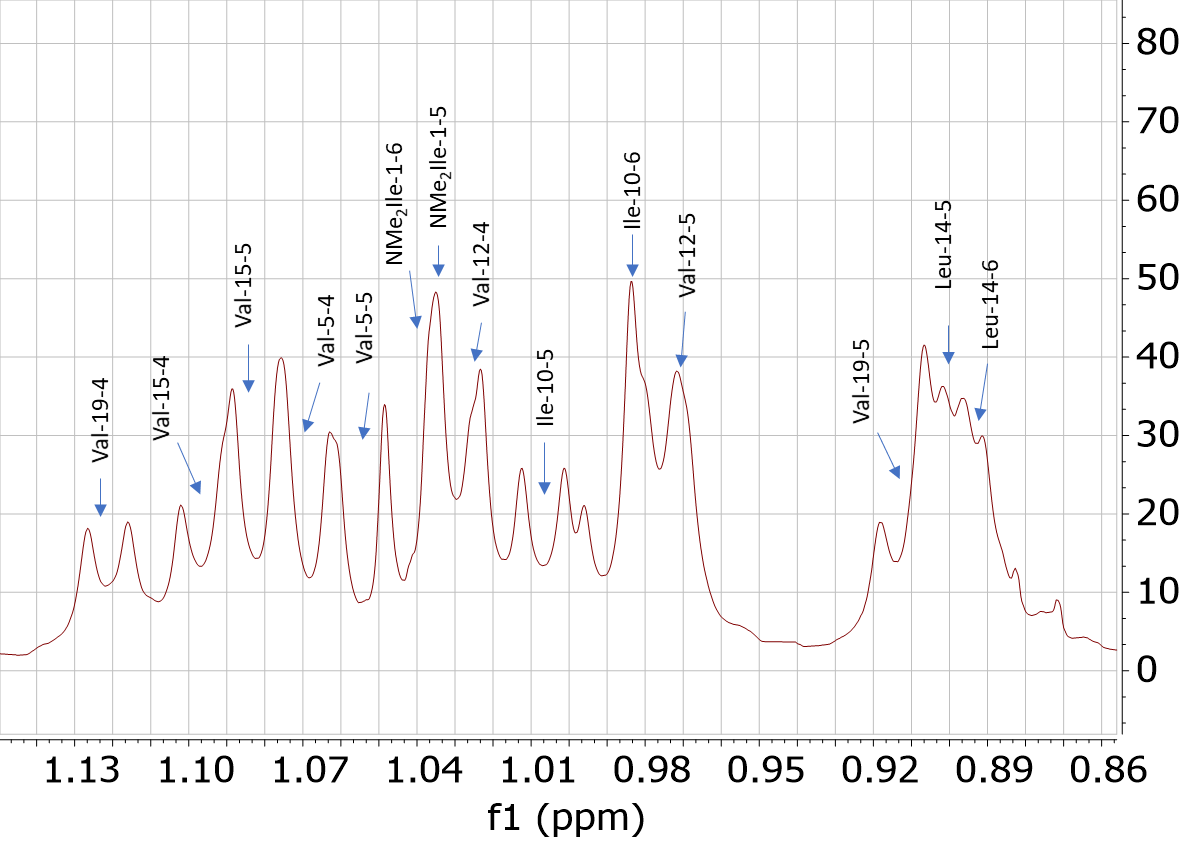


Figure S24. Expanded and annotated 1H NMR spectrum of **1**.


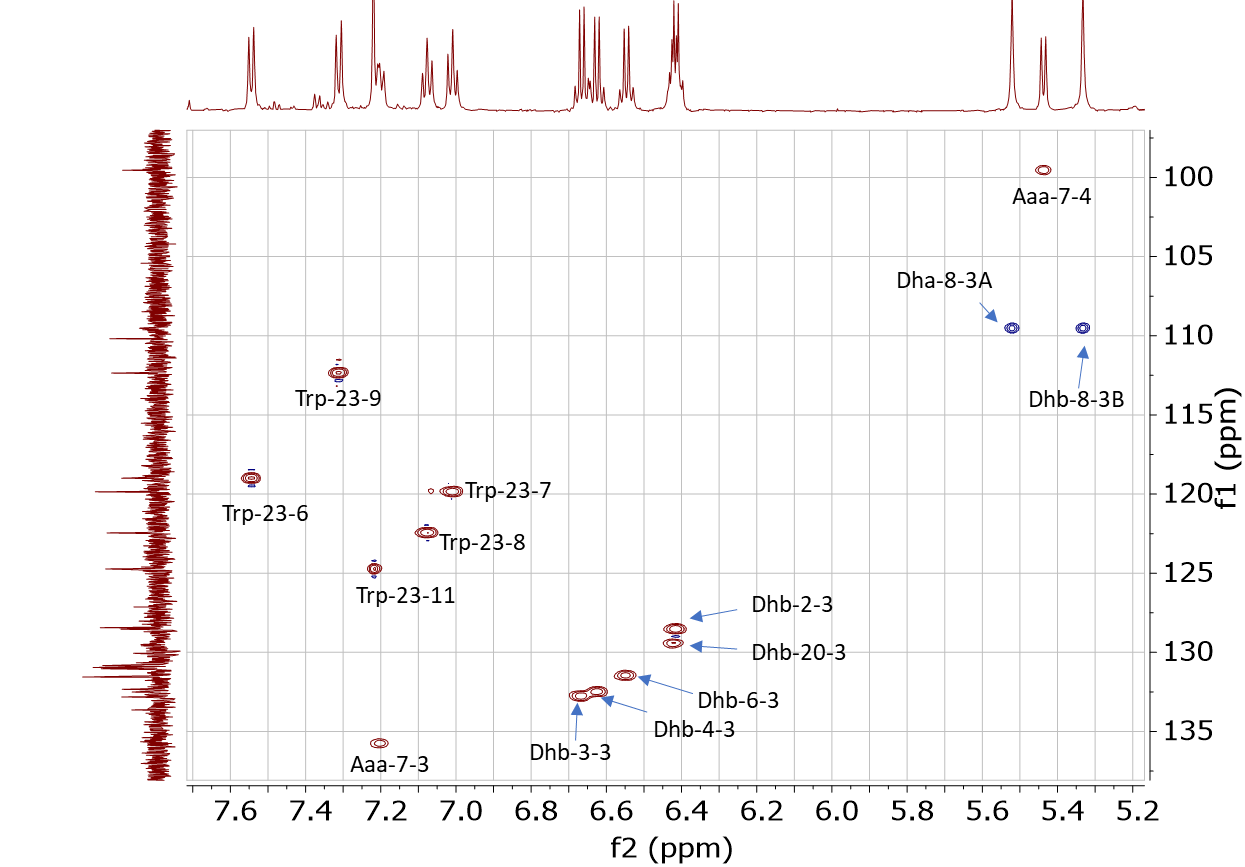


Figure S25. Expanded and annotated HSQC spectrum of **1**.


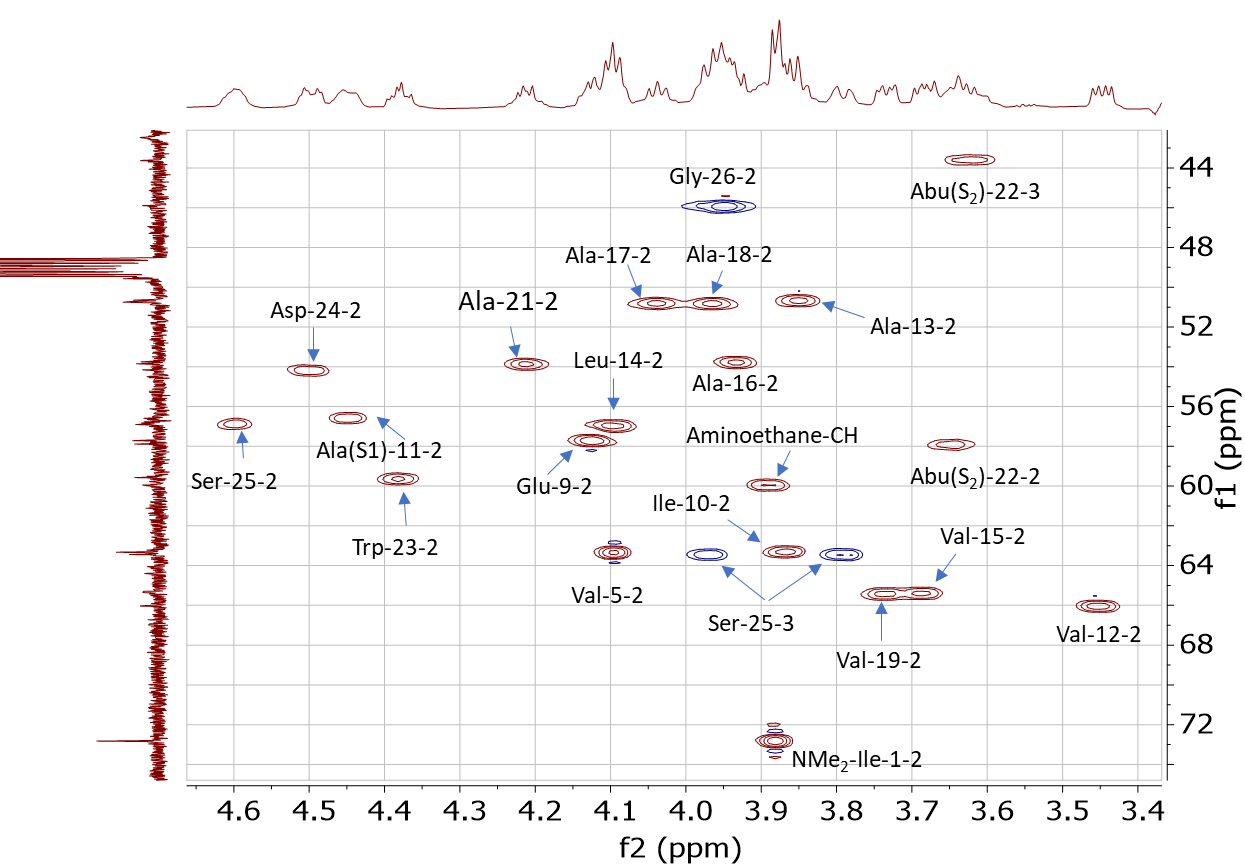


Figure S26. Expanded and annotated HSQC spectrum of **1**.


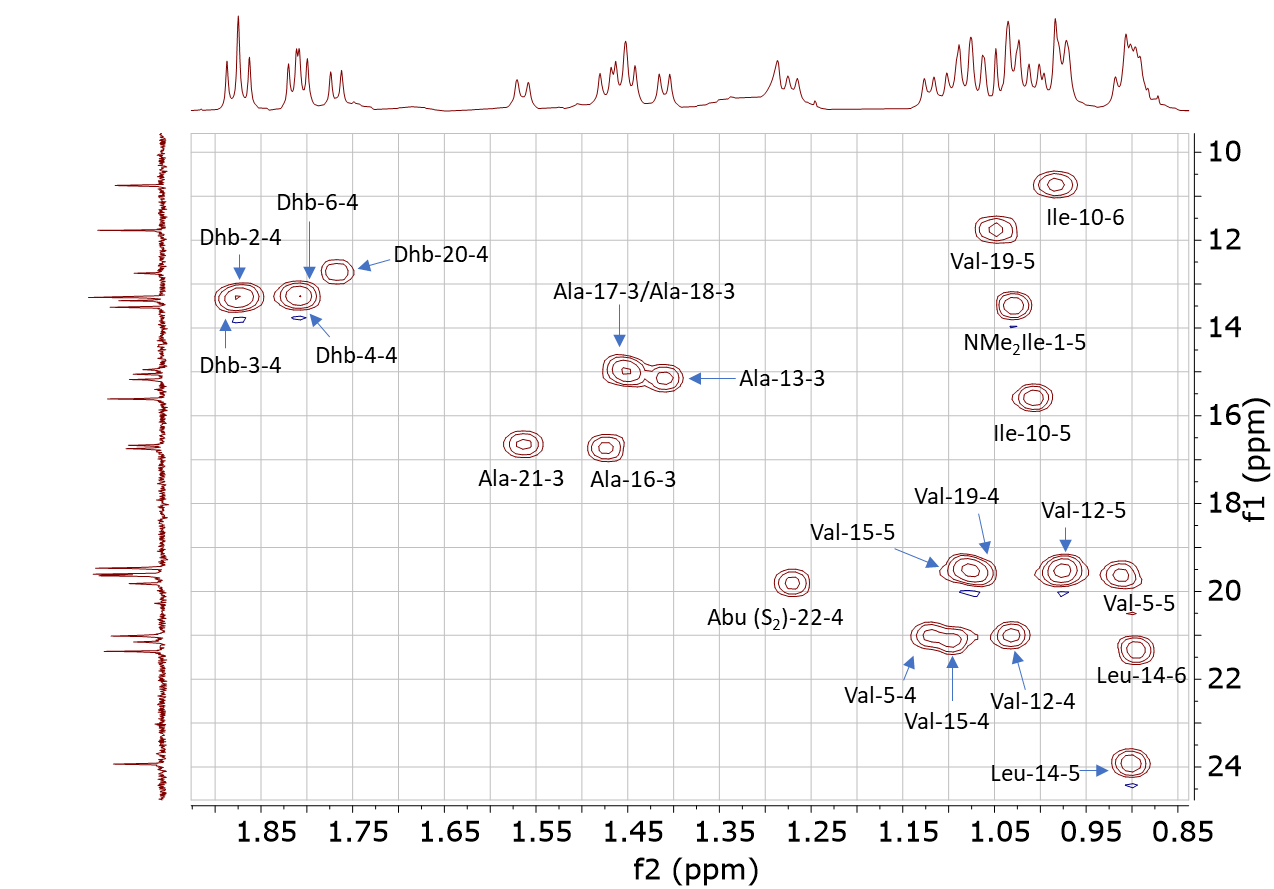


Figures S27. Annotated HSQC spectrum of **1**.

Figure S28. Key cross-peaks in the COSY, HMBC, and ROESY spectra of the *bis*-thioethane unit of **1**, indicating an unprecendented *bis*-thiothane cross link has been found to be present in **1**.


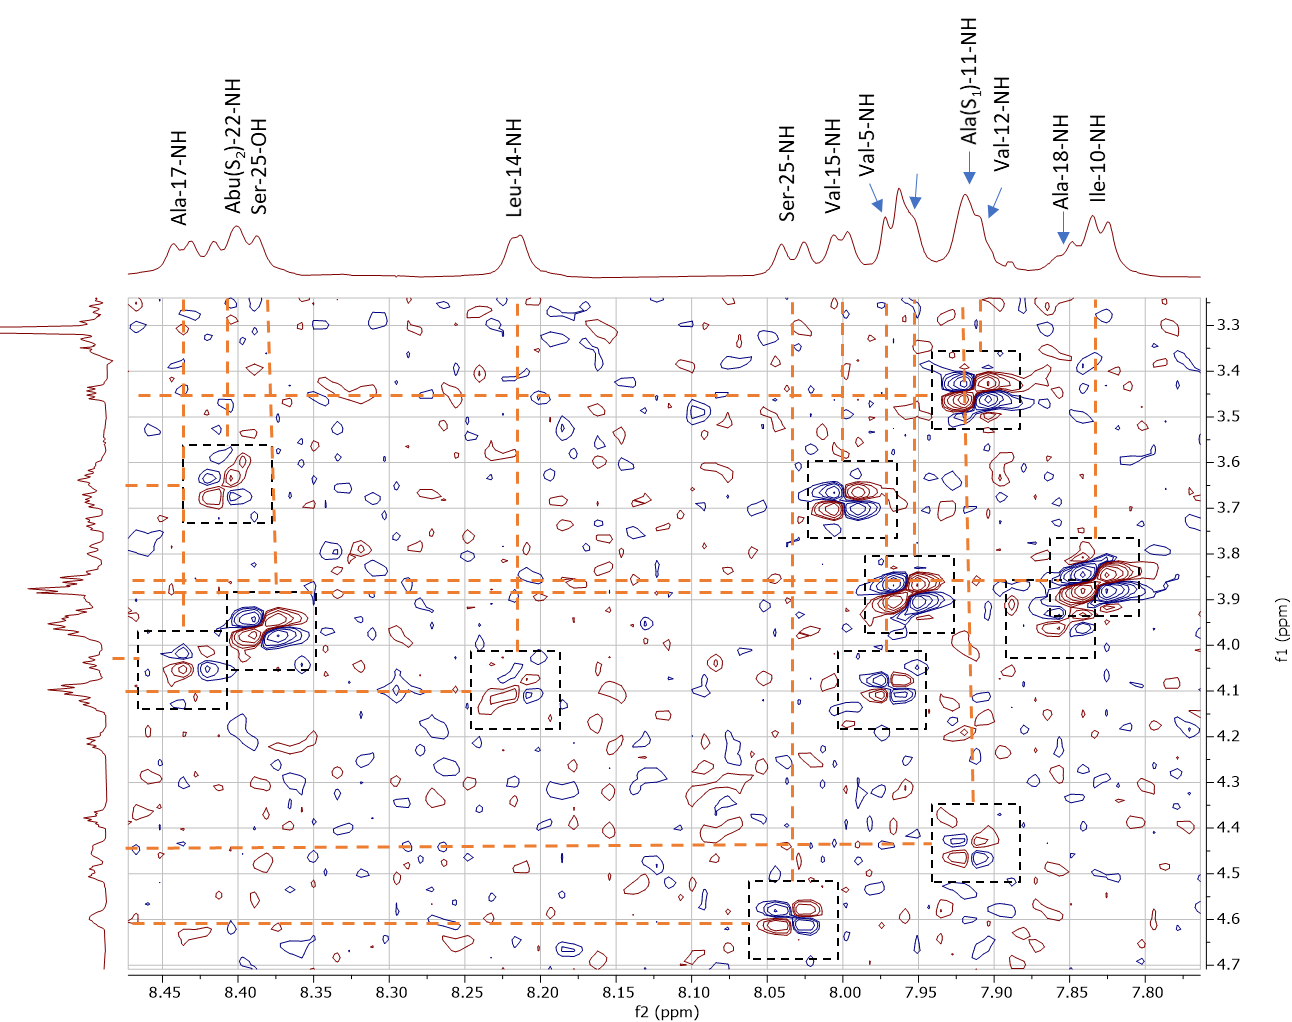


Figure S29. Assignment of NHs in key amino acid residues using COSY correlations between α to NH of amino acid residue.


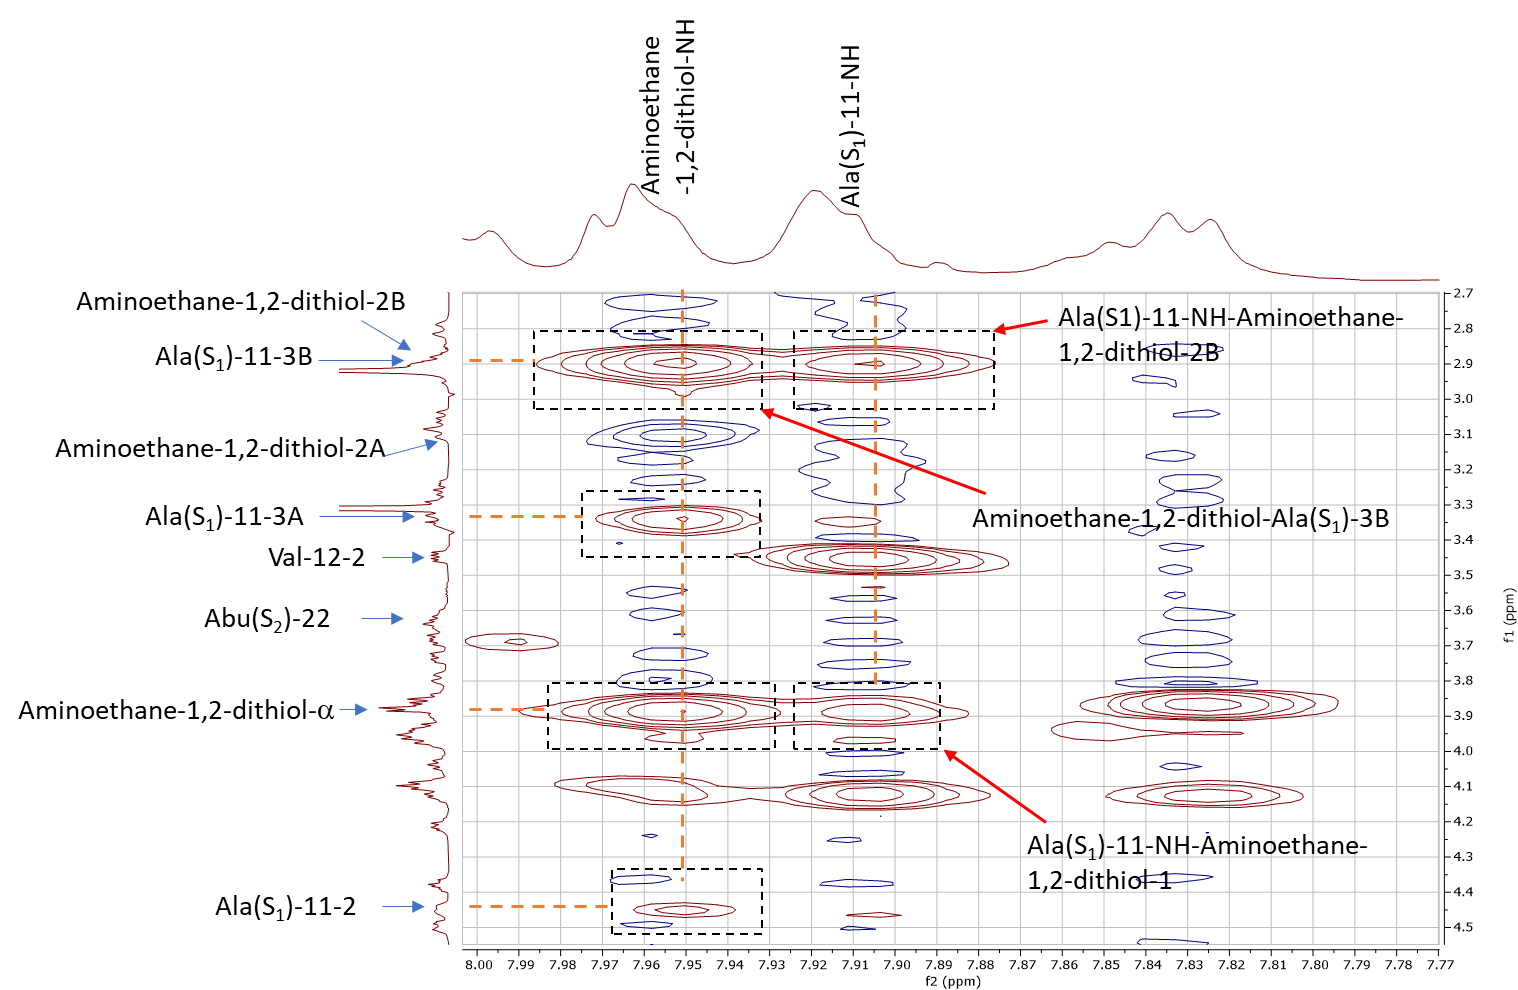


Figure S30. Key correlations in the ROESY spectrum showing link between Ala(S1)-11 and aminoethane-1,2-dithiol group.

Figure S31. The planar structure of **1** with COSY/HSQC-TOCSY, HMBC (H→C) observed correlations of **1**.

**
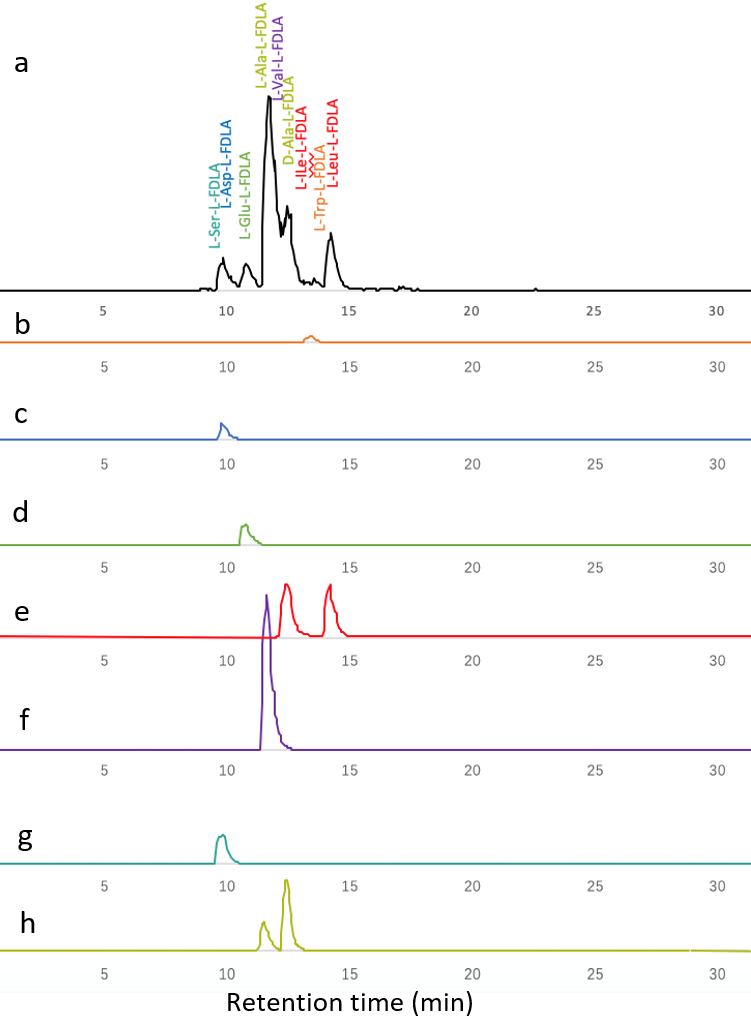
**

Figure S32. **a**. EIC chromatography of proteinogenic amino acids residues from kintamdin from advanced Marfey’s derivatization. **b-h**. EIC chromatography of individual derivatized proteinogenic amino acid residues, Trp, Ser, Glu, Ile, Leu, Val, Asp and Ala, respectively.

**
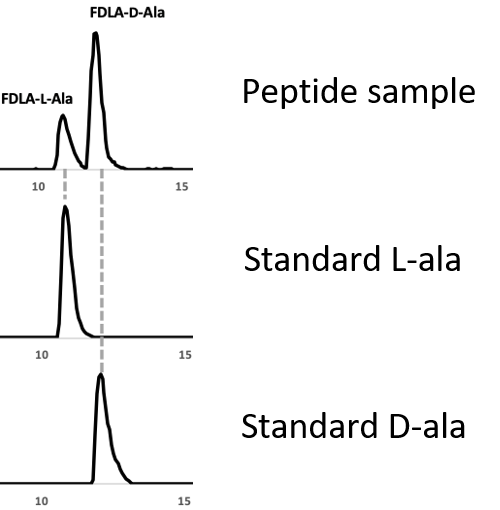
**

Figure S33. EIC chromatography of derivatized Ala residues from **1** (top), standard L-Ala (middle) and standard D-Ala, indicating the presence of three D-Ala residues in **1**.

Aaa-7-2

Dha-8-3A

Dha-8-3B

Abu (S2)-22-4

Fat

Figure S34. Observed ROE correlation between Aaa-7-2 and the methyl group of Abu(S2)-22-4.

Ala-21-2

Asp-24-3A

Aminoethane-2B

Figure S35. Observed ROE correlation between Ala-21-2 and Asp-24-3A.

Leu-14-3A

Aminoethane-1,2-dithiol-1

Figure S36. Observed ROE correlation between Ala-21-2 and Leu-14-3A.

**
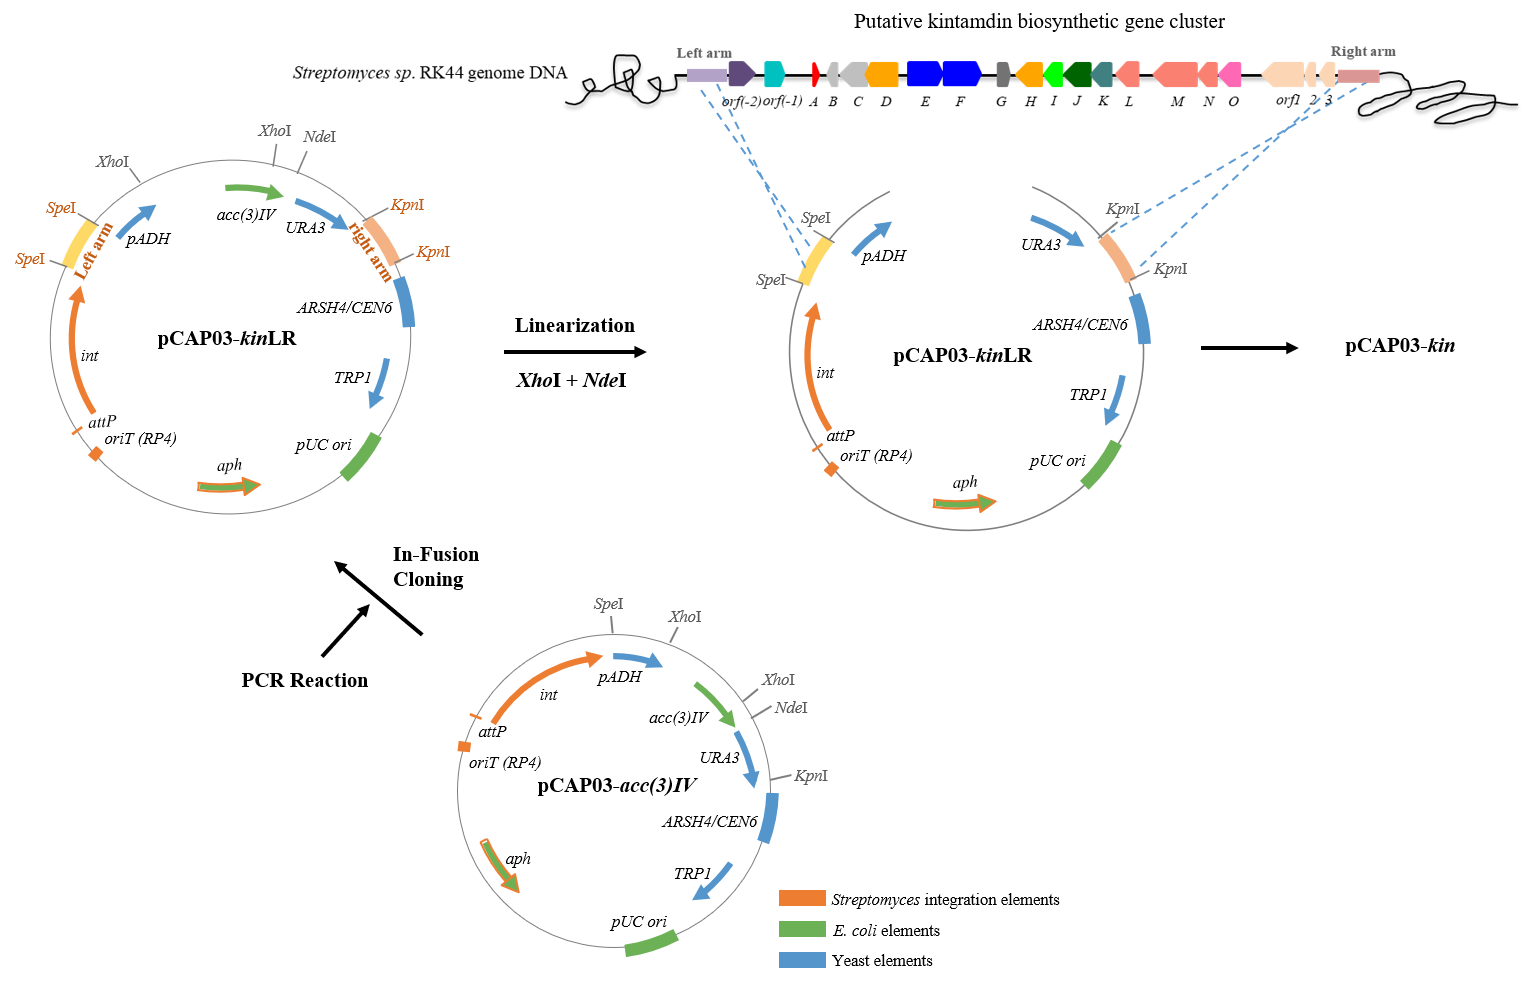
**

Figure S37. Scheme of a modified TAR cloning strategy by inserting two arms into the original pCAP03-*acc(3)IV* plasmid to generate pCAP03-*kin*LR construct. To improve the capture efficiency, two 1kb homologous arms that flank the upstream and downstream regions of the BGC of interest were amplified and inserted into the *Spe*I site and the *Kpn*I site of pCAP03-*acc(3)IV*, respectively. In this construction method, the pADH-ura3 counter selection system was kept for counteracting plasmid recircularization in yeast due to nonhomologous end joining (NHEJ).

**
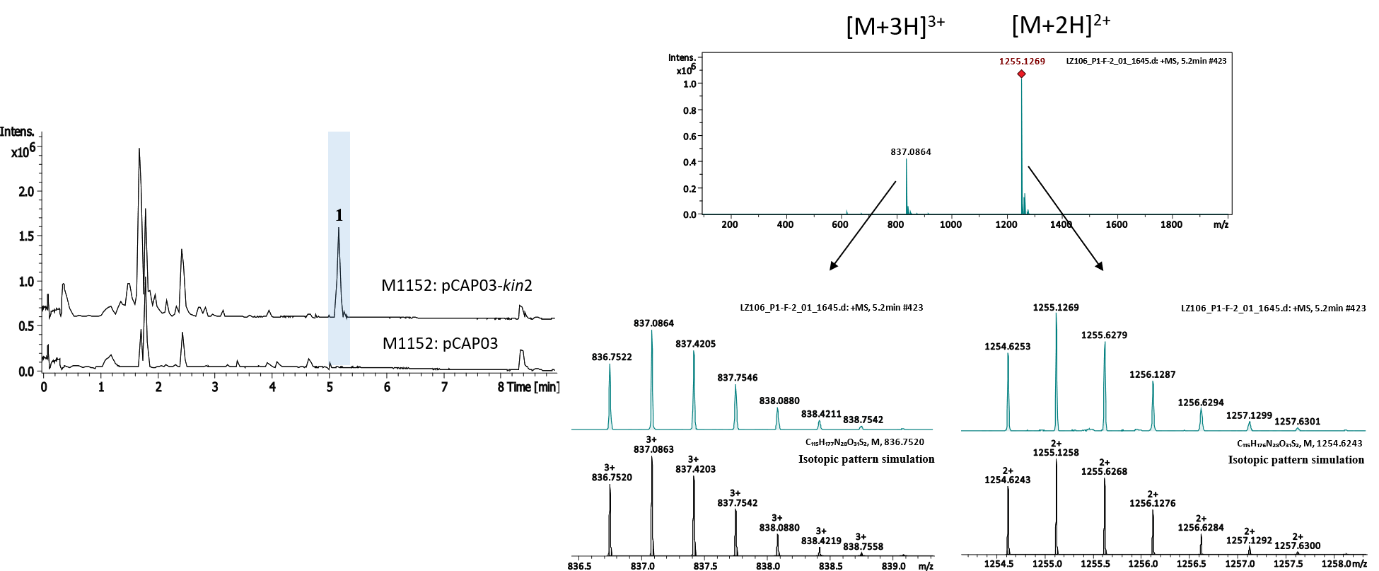
**

Figure S38. MS analysis of **1** identified from heterologous expression system.

**
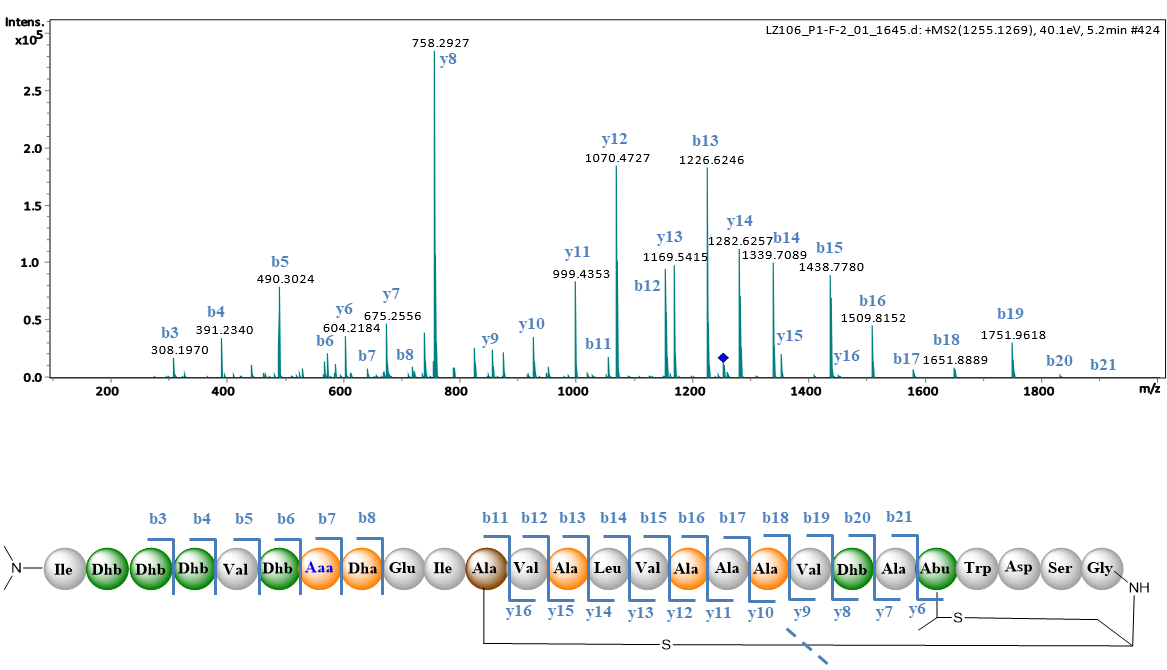
**

Figure S39. Tandem MS analysis of **1** identified in the heterologous expression system.

**
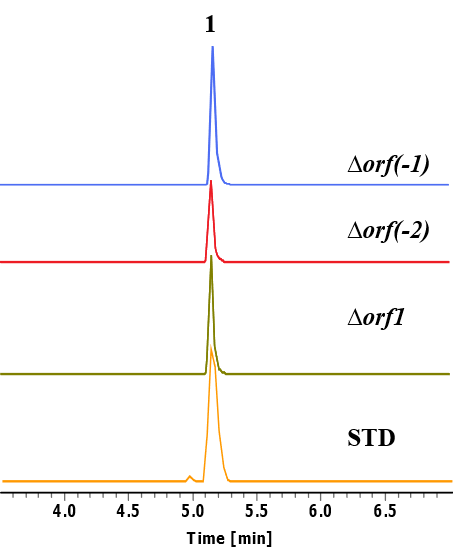
**

Figure S40. EIC extraction of 1 in the variants.

**
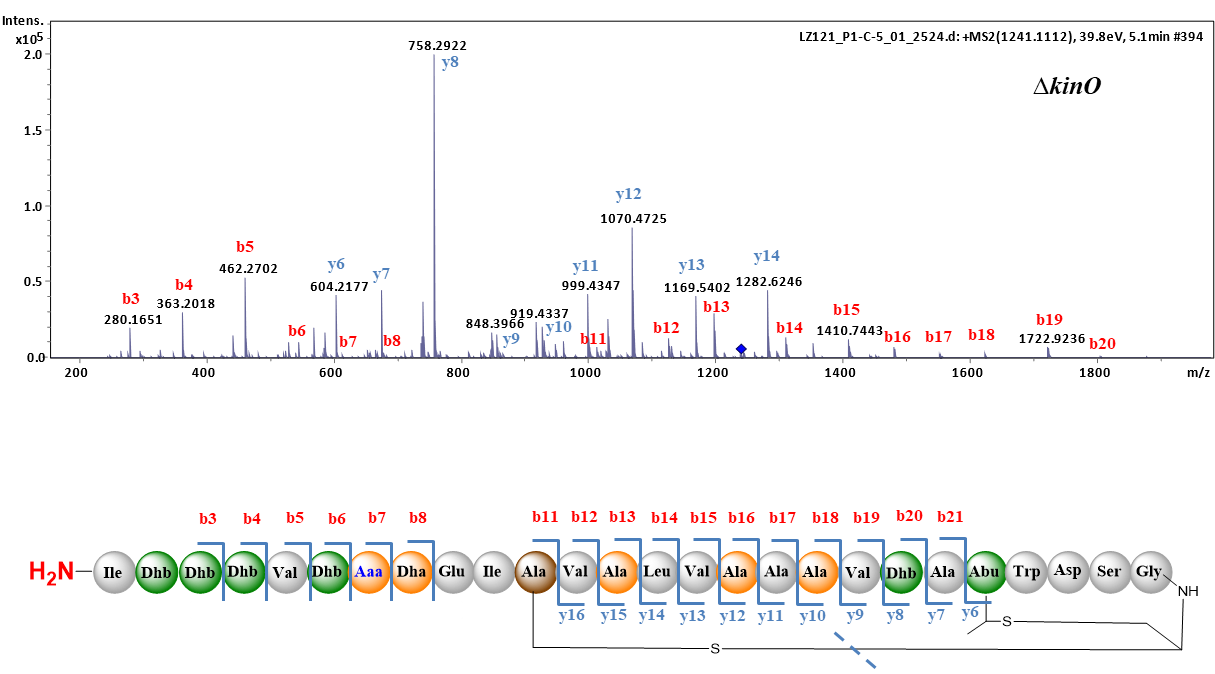
**

Figure S41. Tandem MS analysis of the intermediate **2** accumulated in the *kinO* variant.


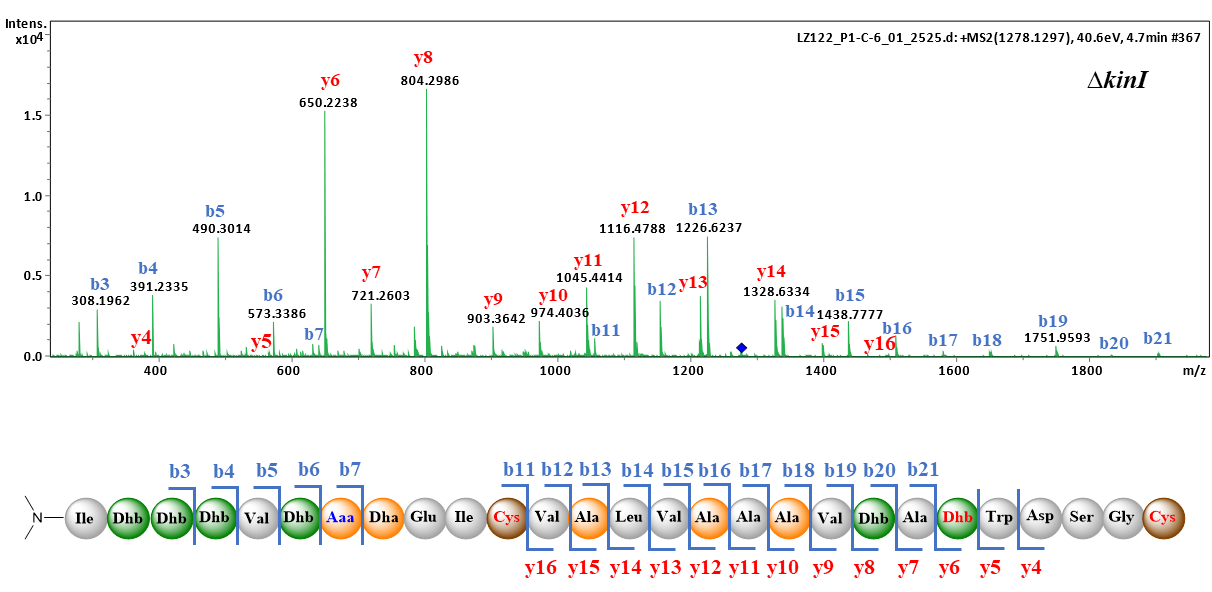


Figure S42. Tandem MS analysis of the intermediate **3** accumulated in the *kinI* variant.

**
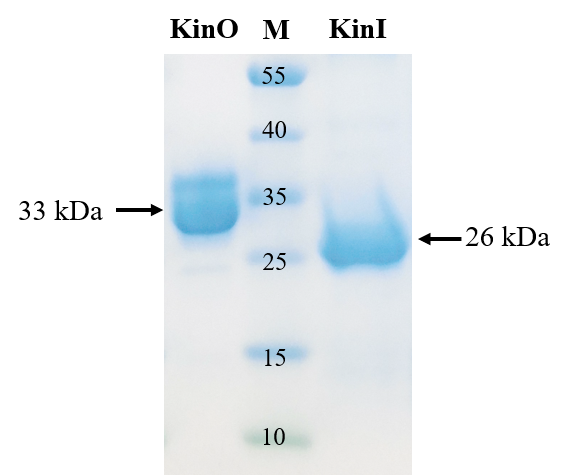
**

Figure S43. SDS page analysis of recombinant KinI (Right) and KinO (Left) with the corrected molecular weights, respectively.

**
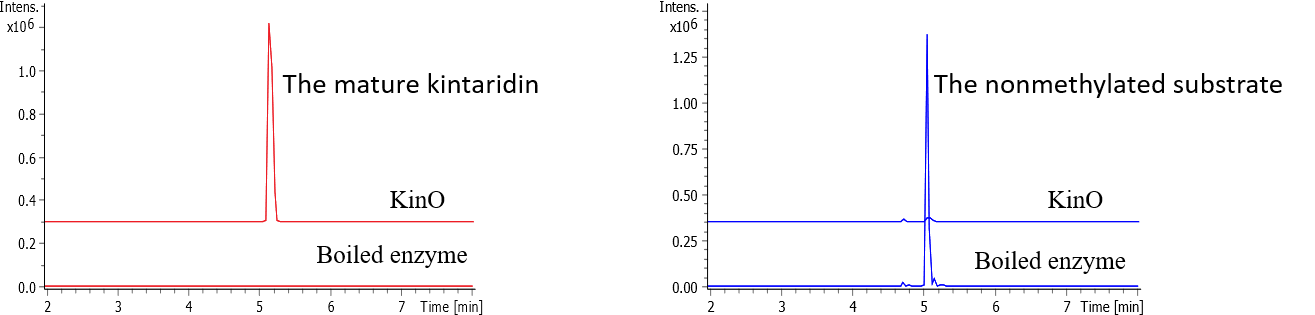
**

Figure S44. EIC analysis of the product generated in the assay of incubation of KinO with **2** accumulated.

**
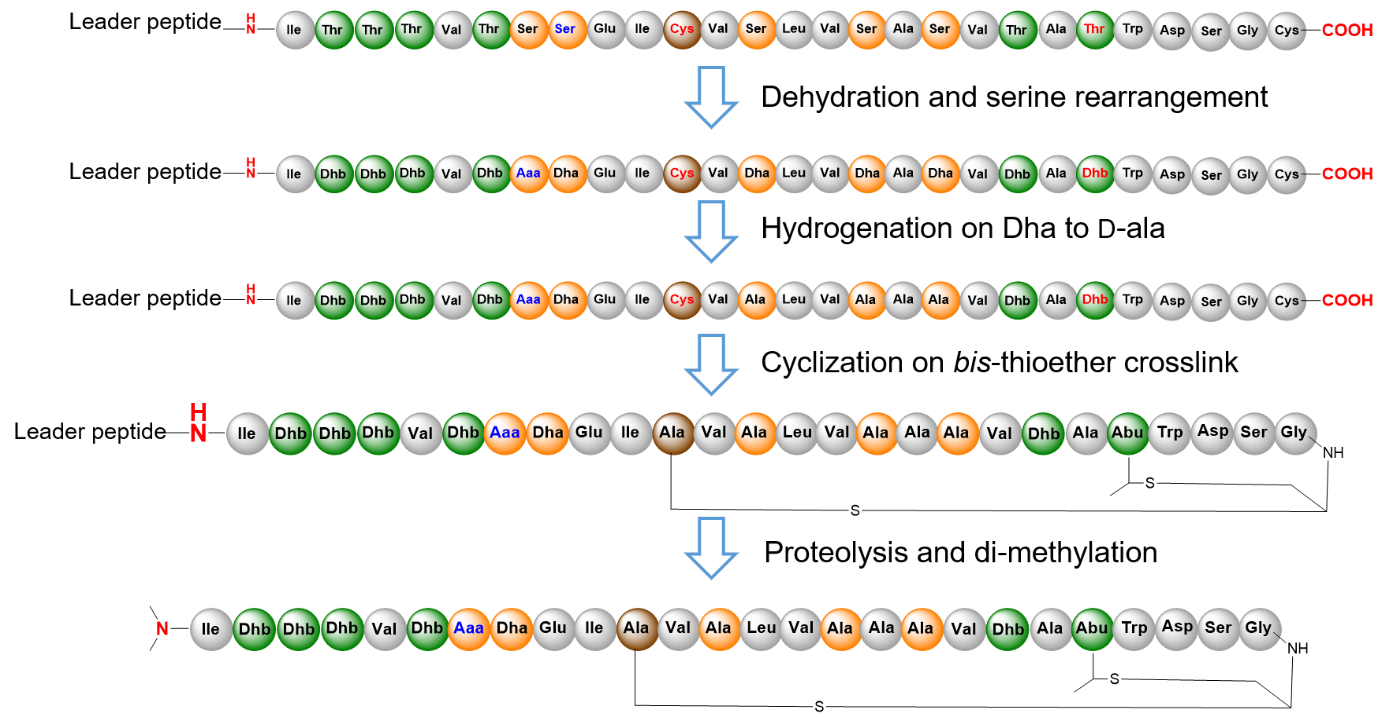
**

Figure S45. Proposed biosynthetic pathway to form kintamdin.

**
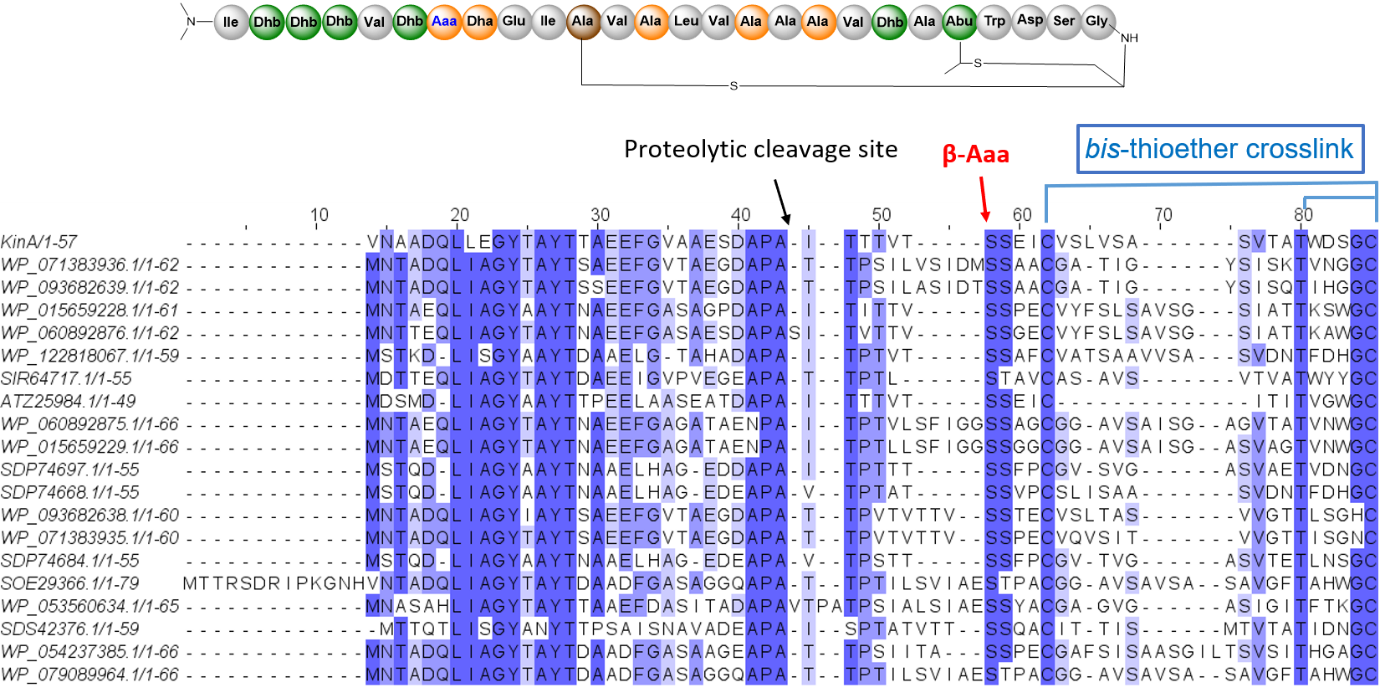
**

Figure S46. Conserved genome context suggested that a group of hypothetical protein are the kintamdin-like precursor peptides with characteristic motifs.
